# Supplementary material for: Application of primary halogenated hydrocarbons for the synthesis of 3-aryl and 3-alkyl indolizines
Source: Royal Society of Chemistry journal article supplement (doi:10.1039/c7ob00980a), 2017-01-01

## *Supporting Information*

# **Application of Primary Halogenated Hydrocarbons for the Synthesis of 3-Aryl and 3-Alkyl Indolizines**

Yan Liu,<sup>a, b</sup> Huayou Hu,<sup>\*a, b</sup> Junyu Zhou,<sup>c</sup> Wenhui Wang,<sup>b</sup> Youliang He<sup>b</sup> and Chao Wang<sup>\*a</sup>

<sup>a</sup> School of Material Science and Engineering, Southwest University of Science and Technology,  
Mianyang 621010, P. R. China.

<sup>b</sup> Jiangsu Key Laboratory for Chemistry of Low-Dimensional Materials, School of Chemistry and  
Chemical Engineering, Huaiyin Normal University, Huaian 223300, P. R. China.

<sup>c</sup> School of Chemistry and Chemical Engineering, Nanjing University, Nanjing 210023, P. R. China.

## **Table of Contents**

**Copies of <sup>1</sup>H NMR of Known compounds: S1**

**Copies of New Compounds' NMR spectra: S6**

Copies of  $^1\text{H}$  NMR of Known compounds:

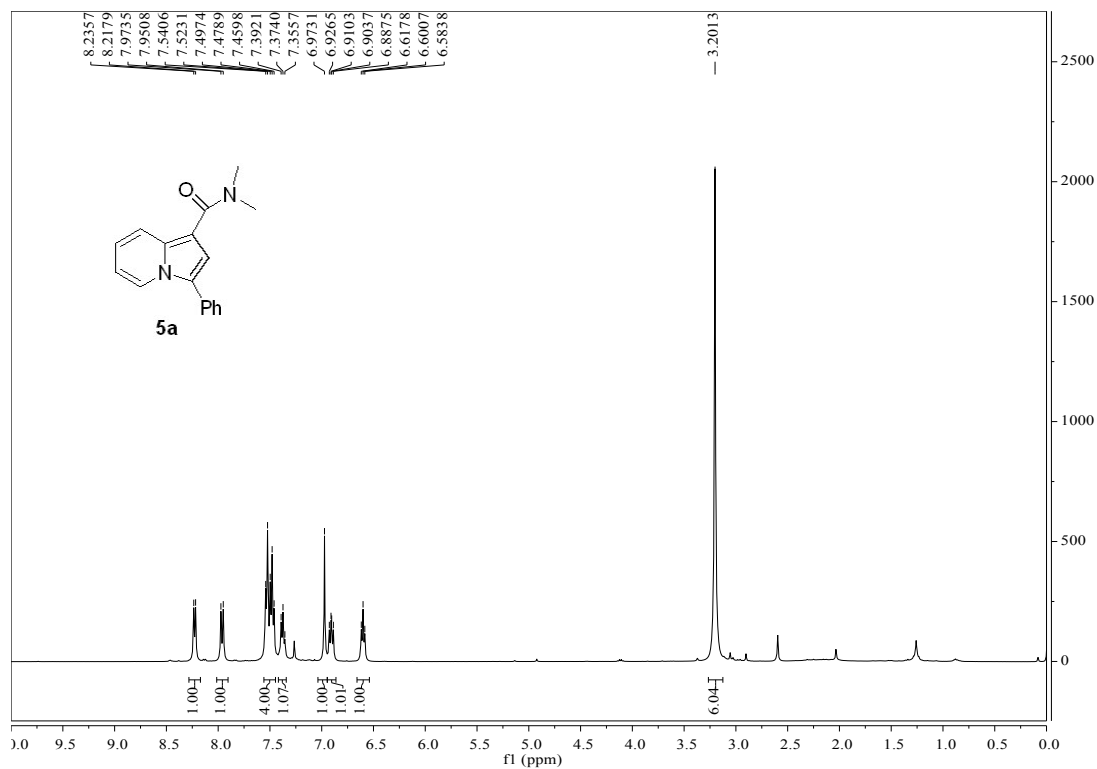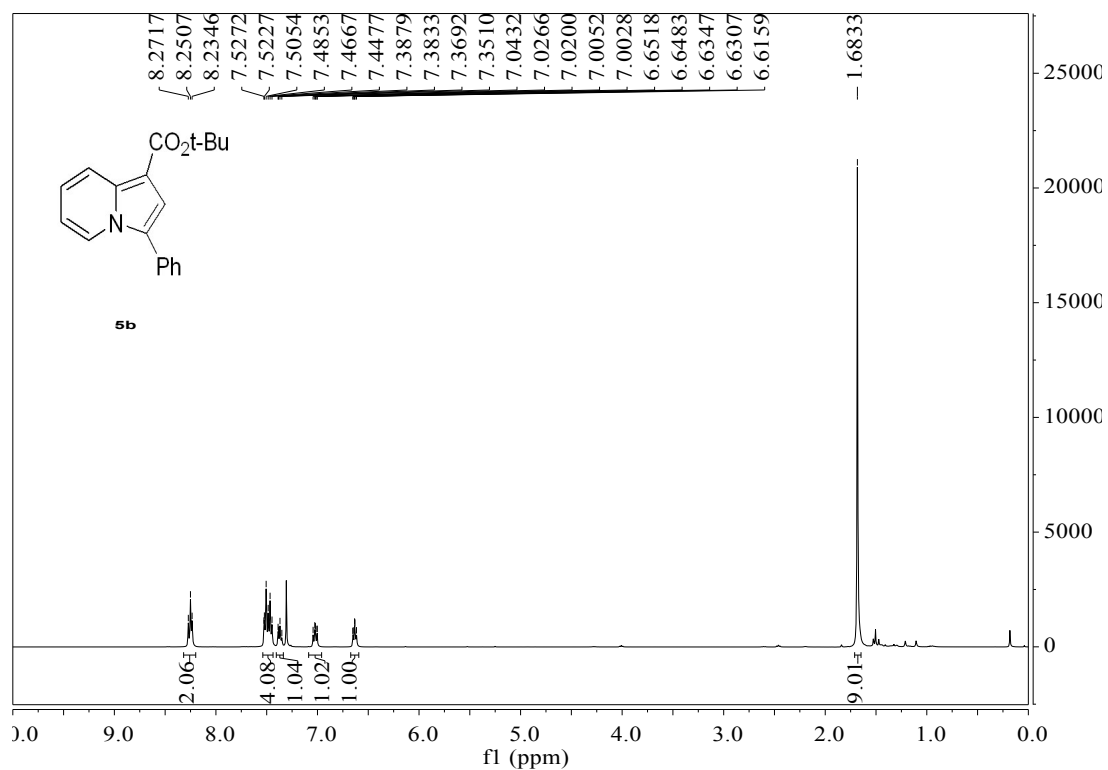

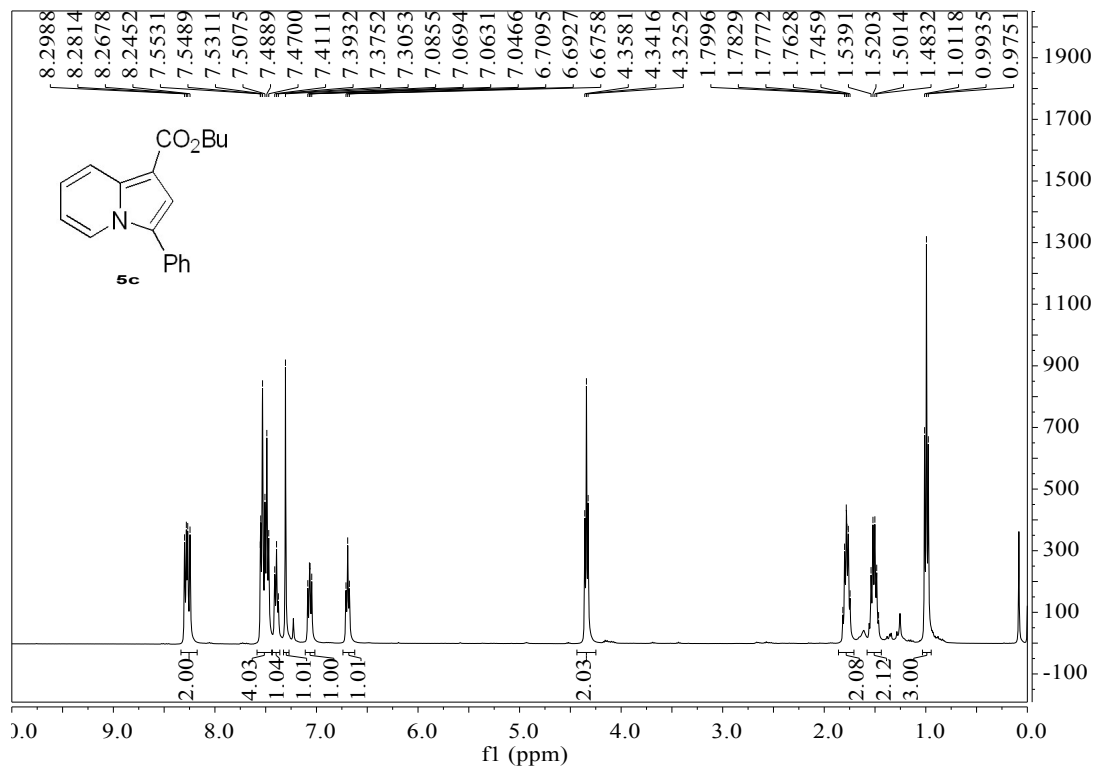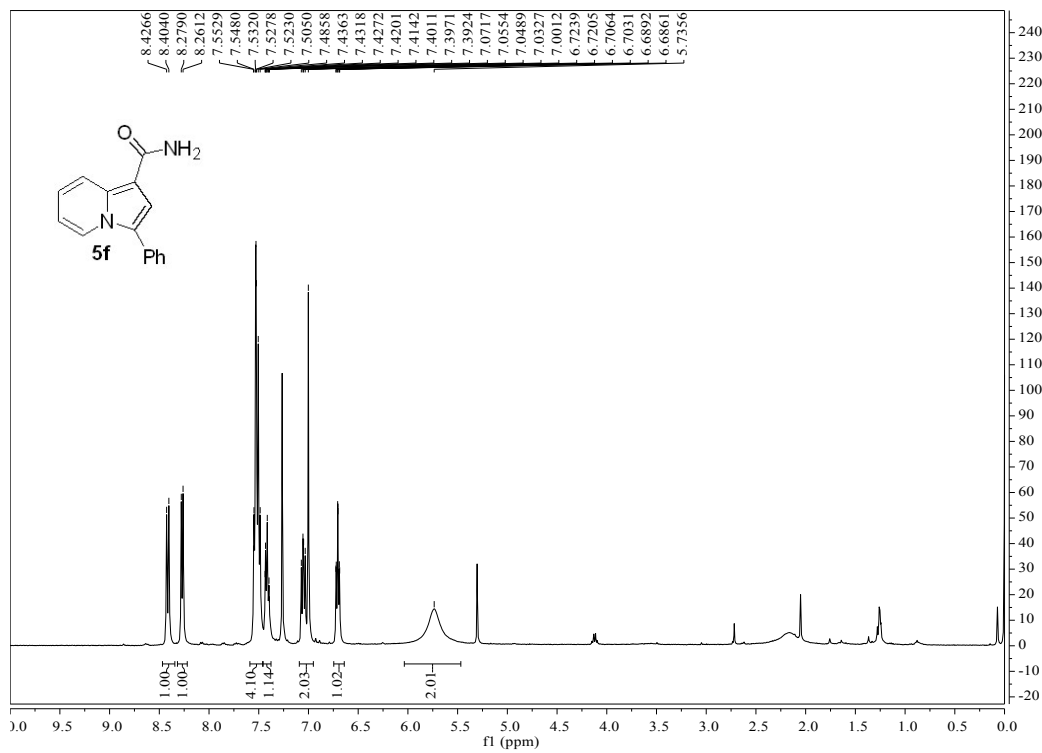

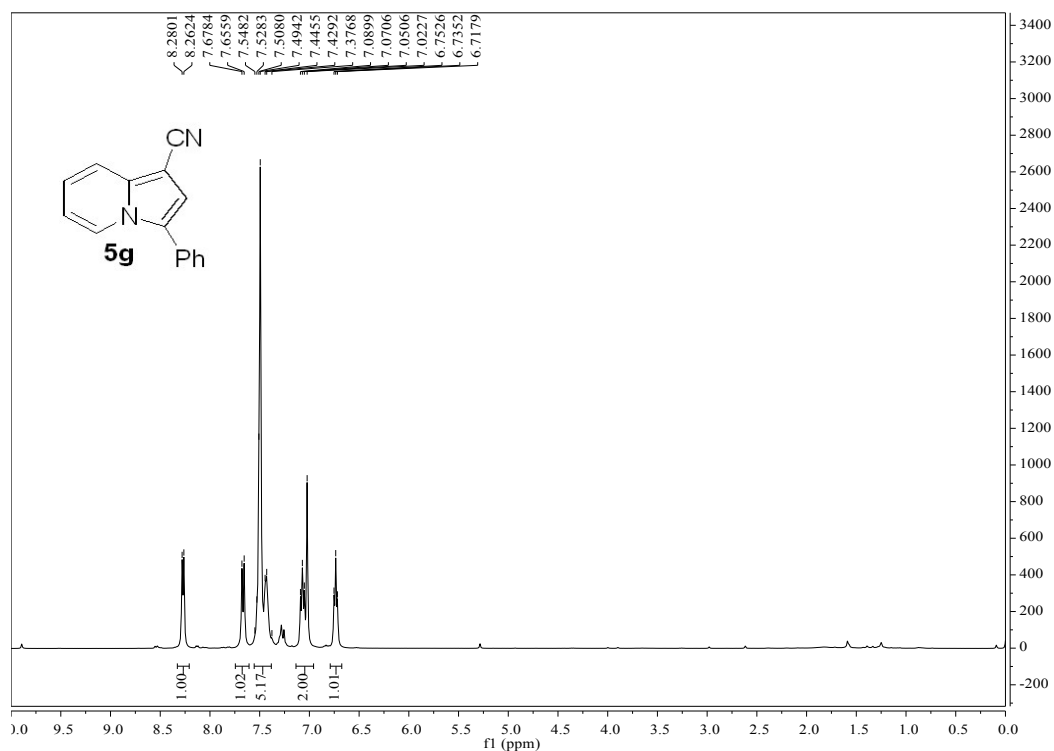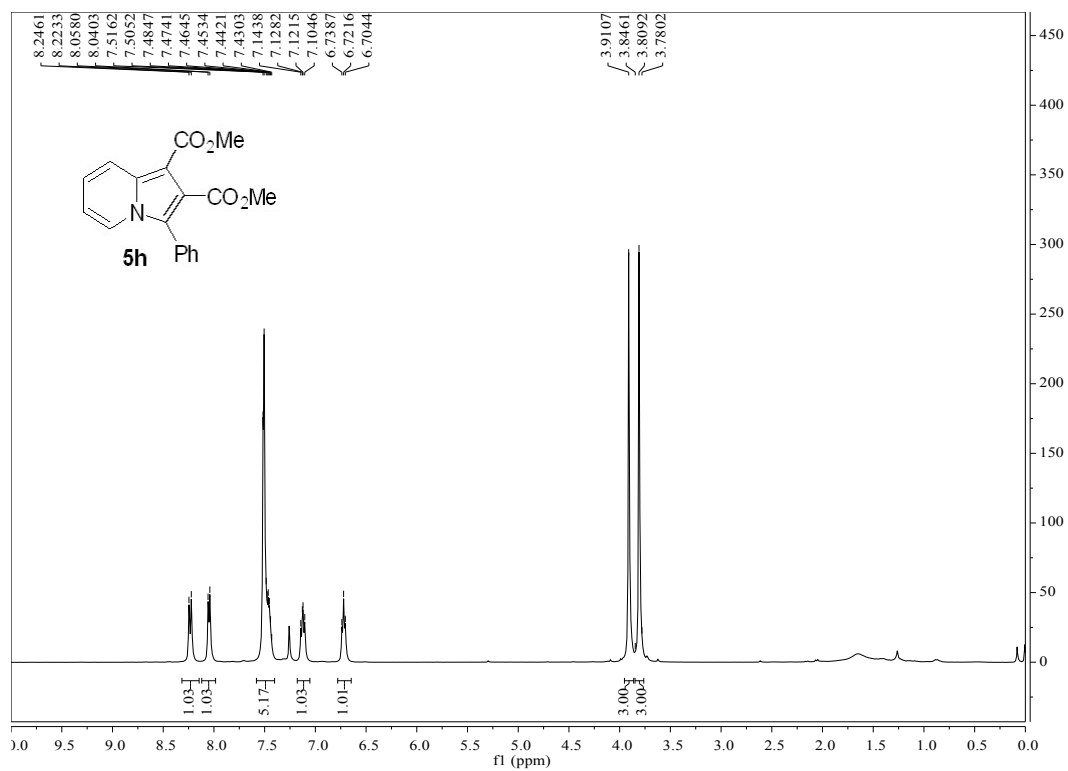

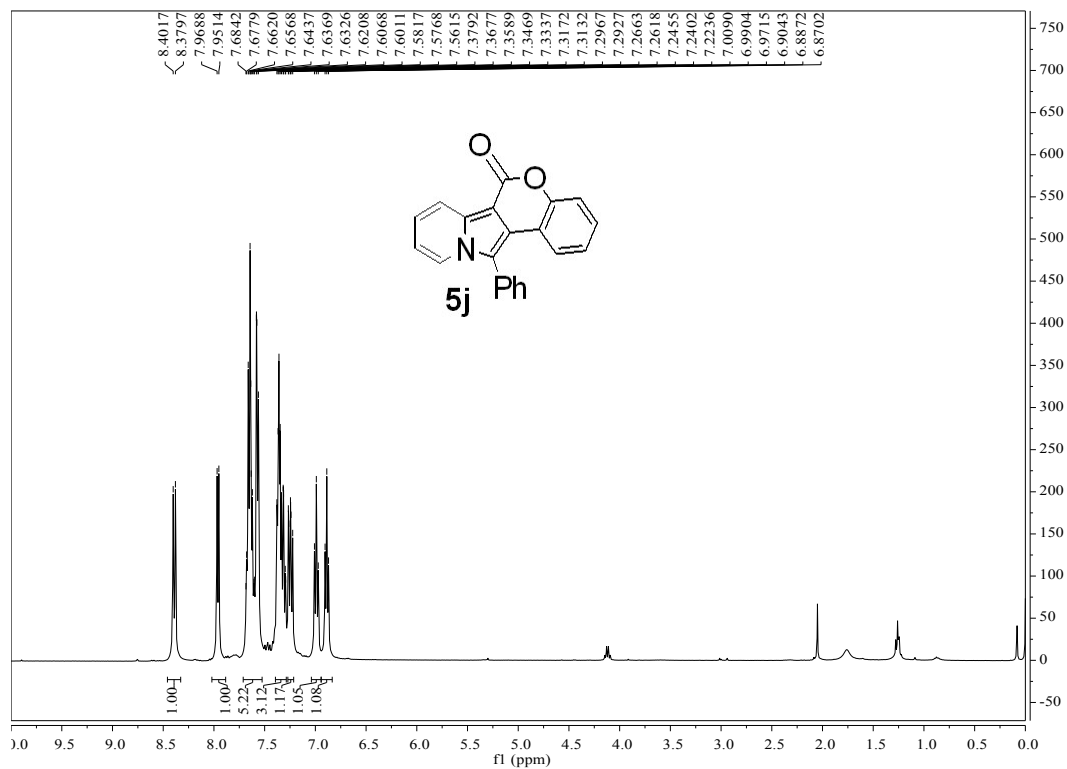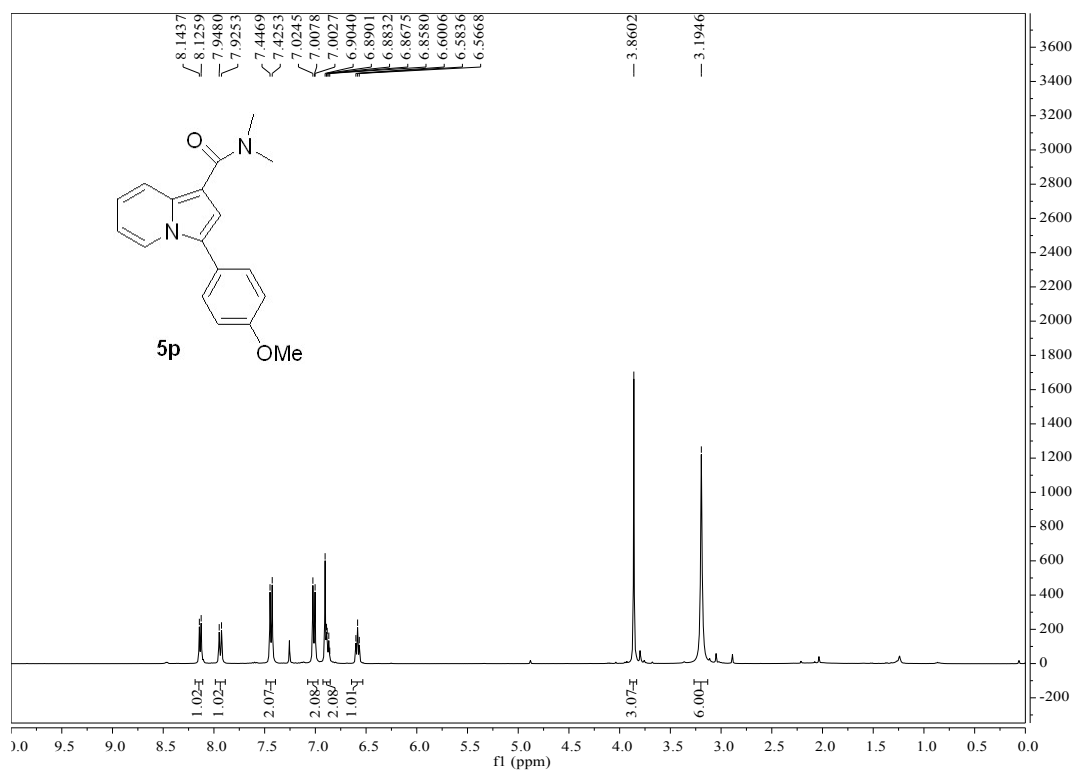

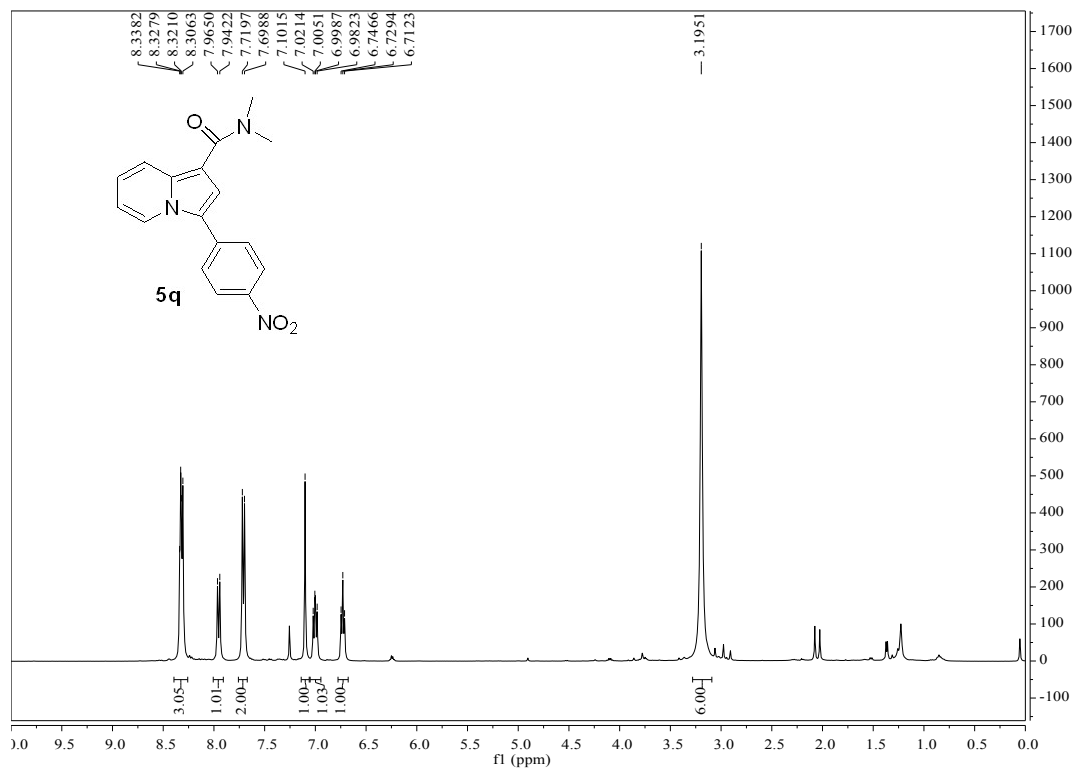

## Copies of New Compounds' NMR spectra:

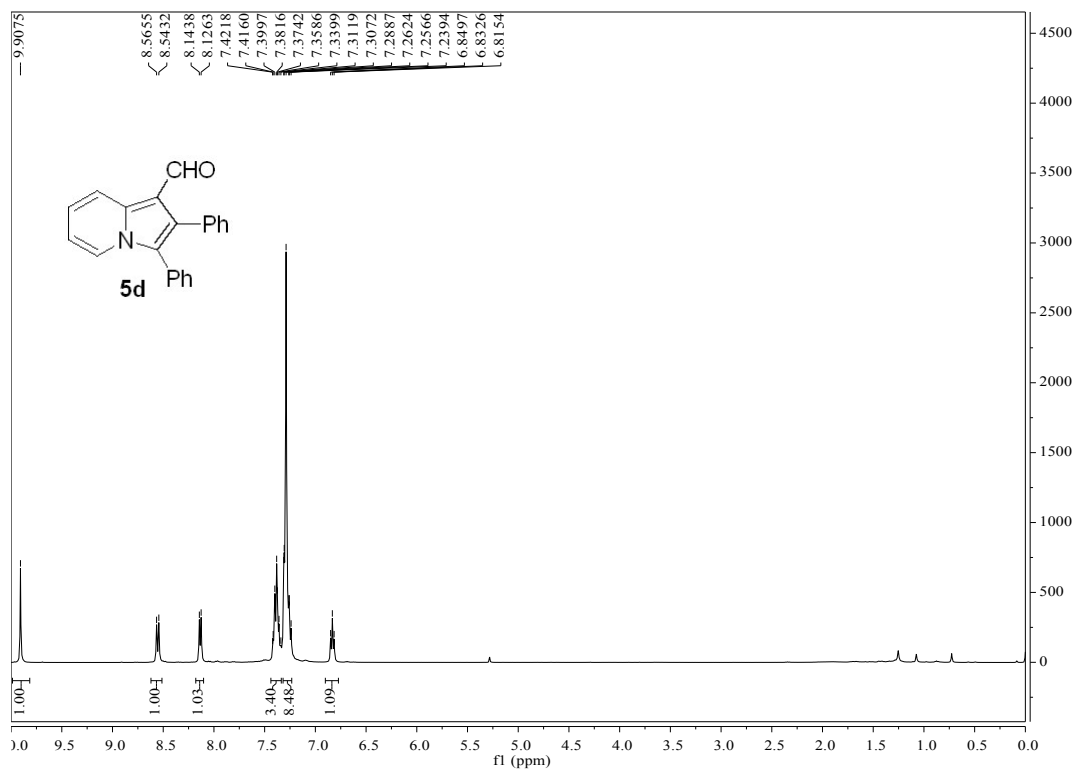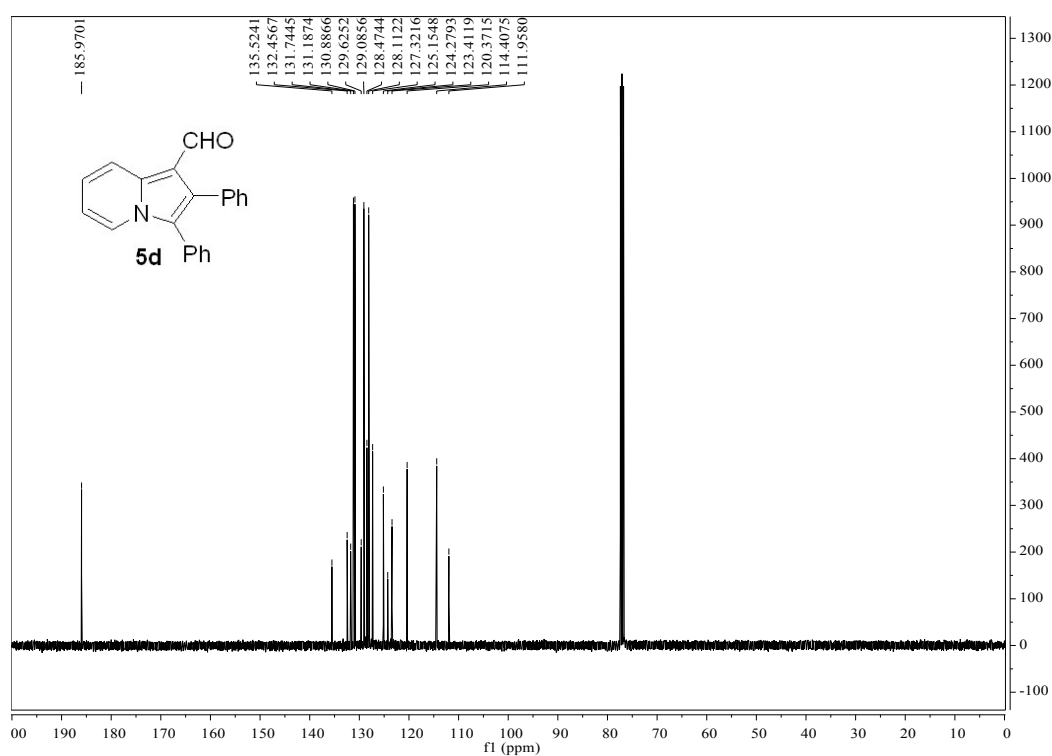

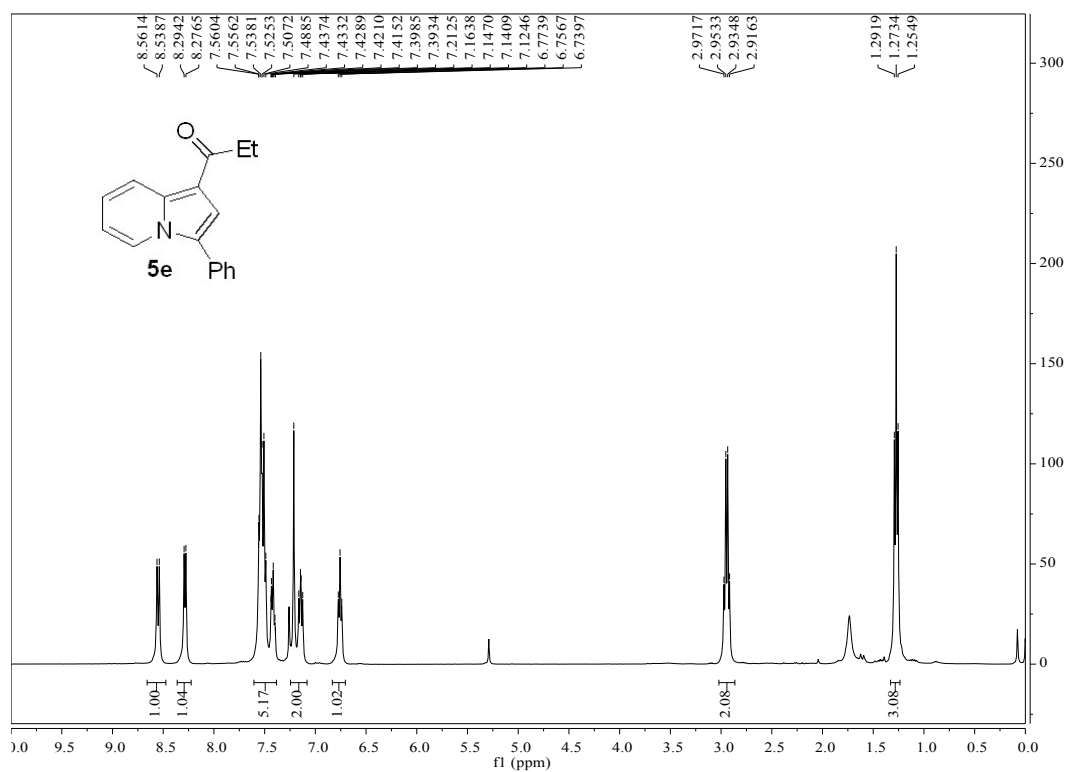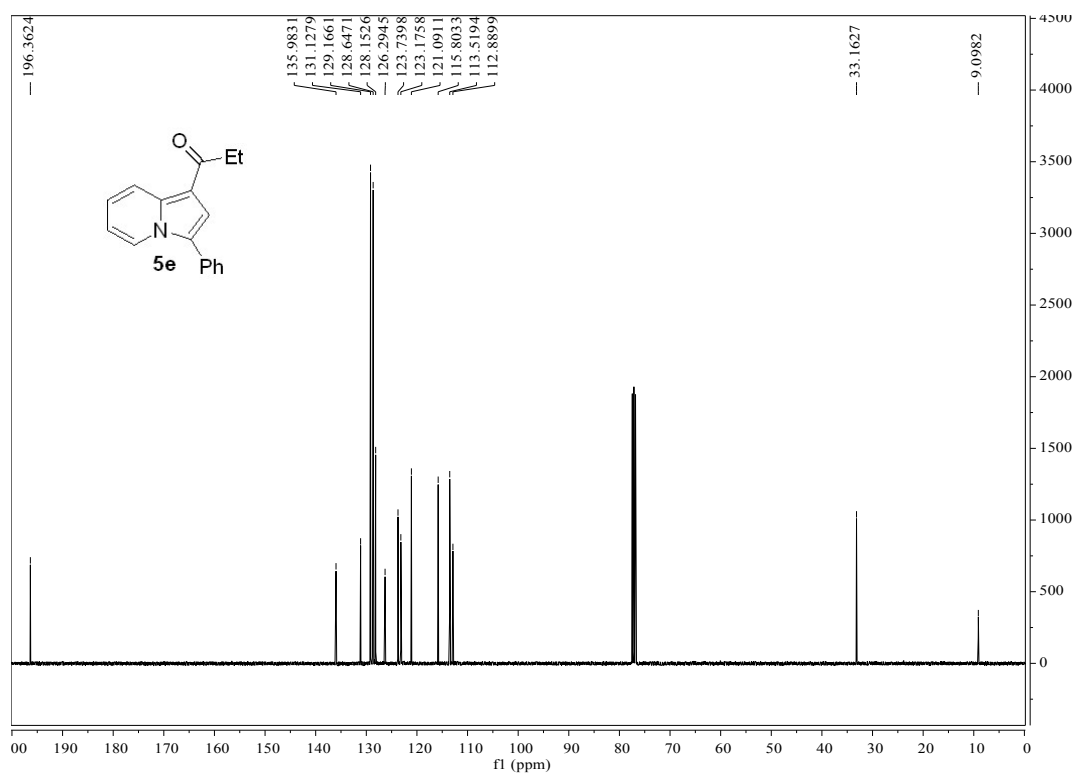



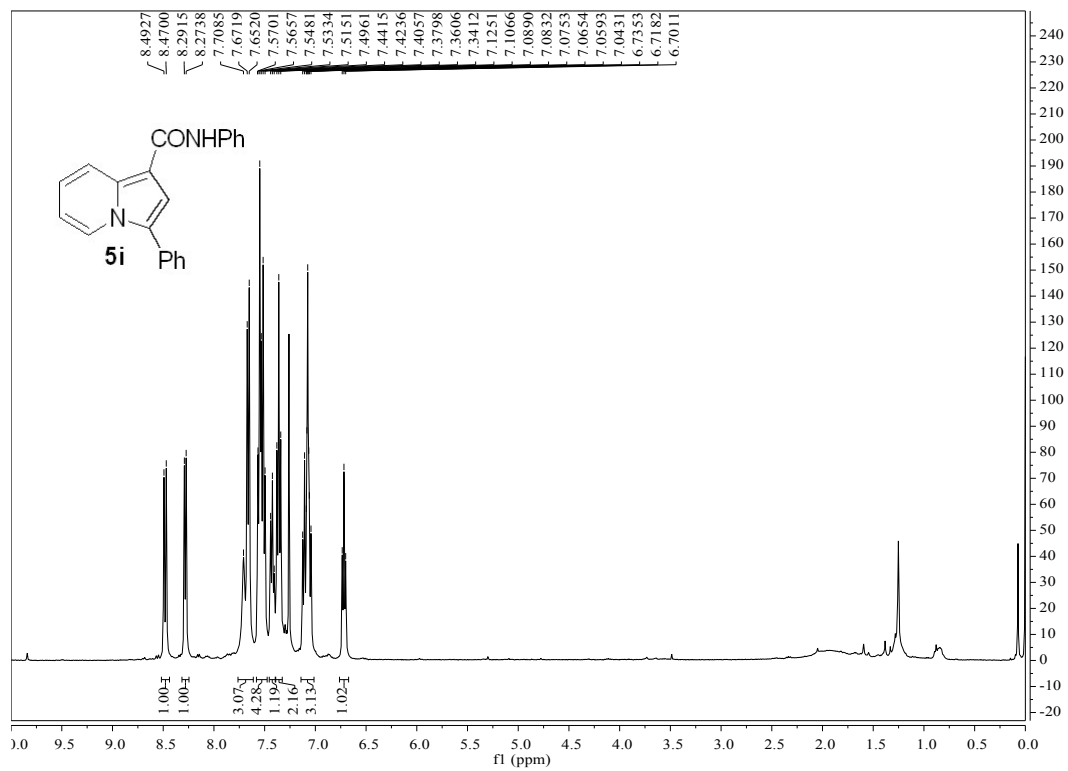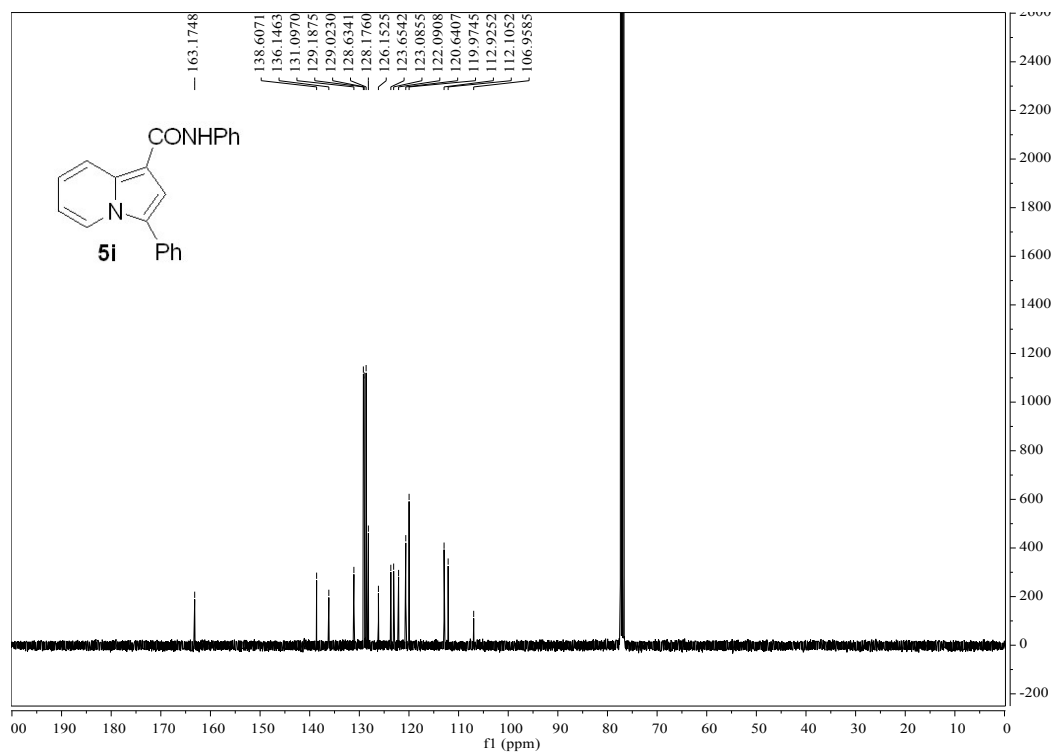

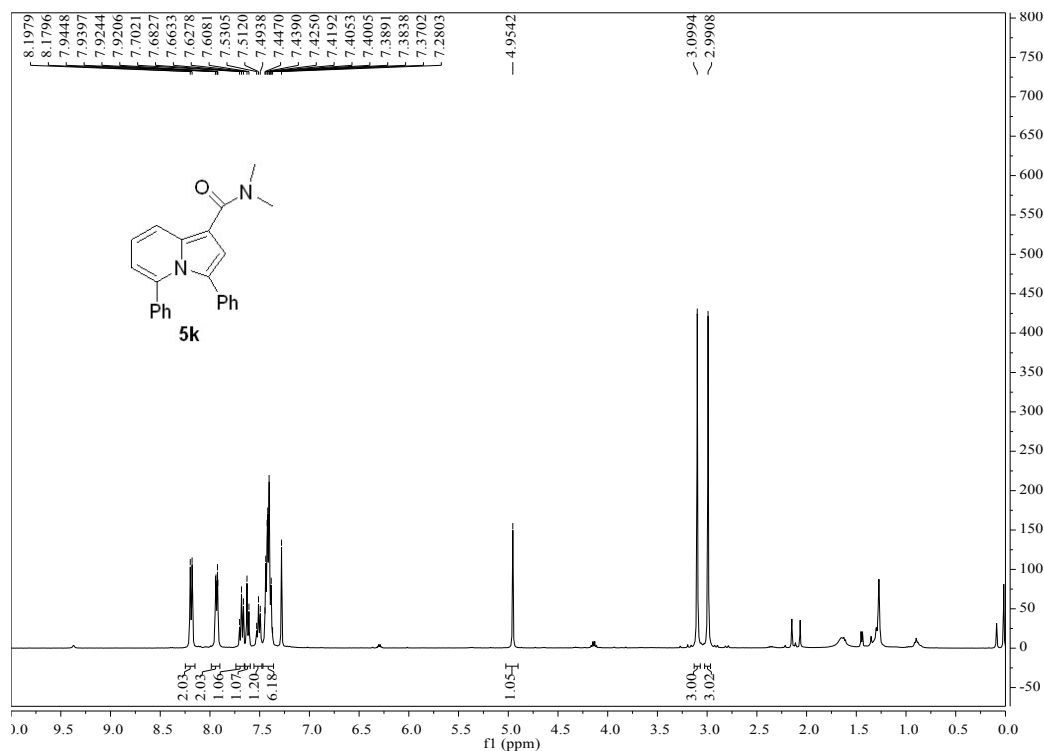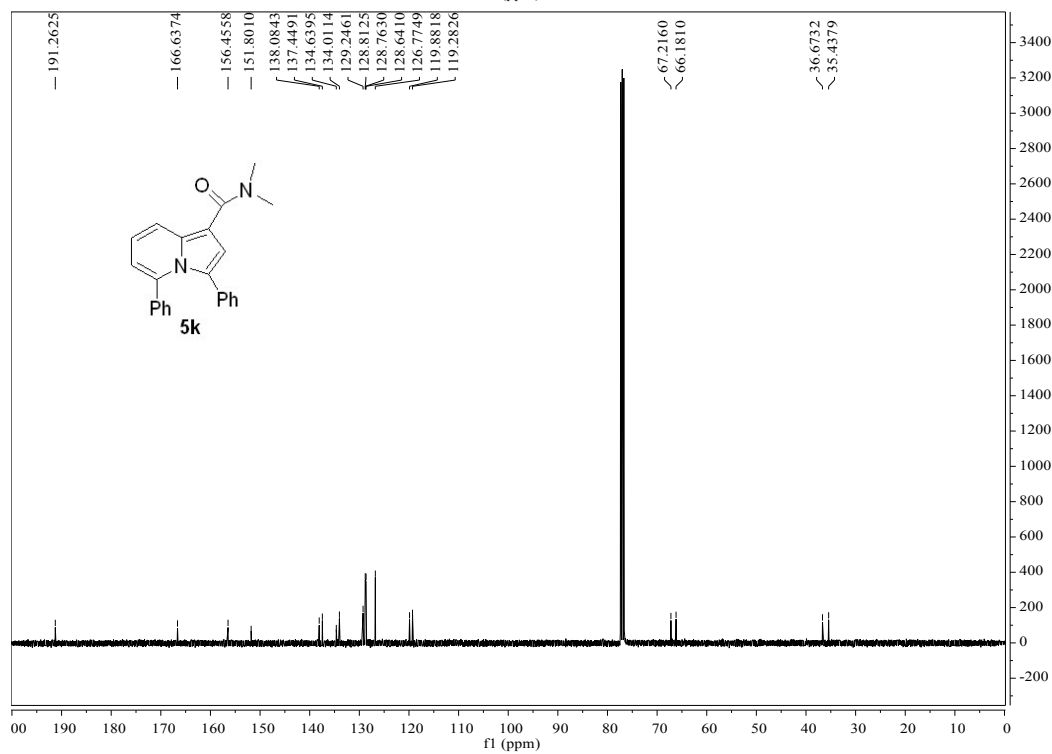

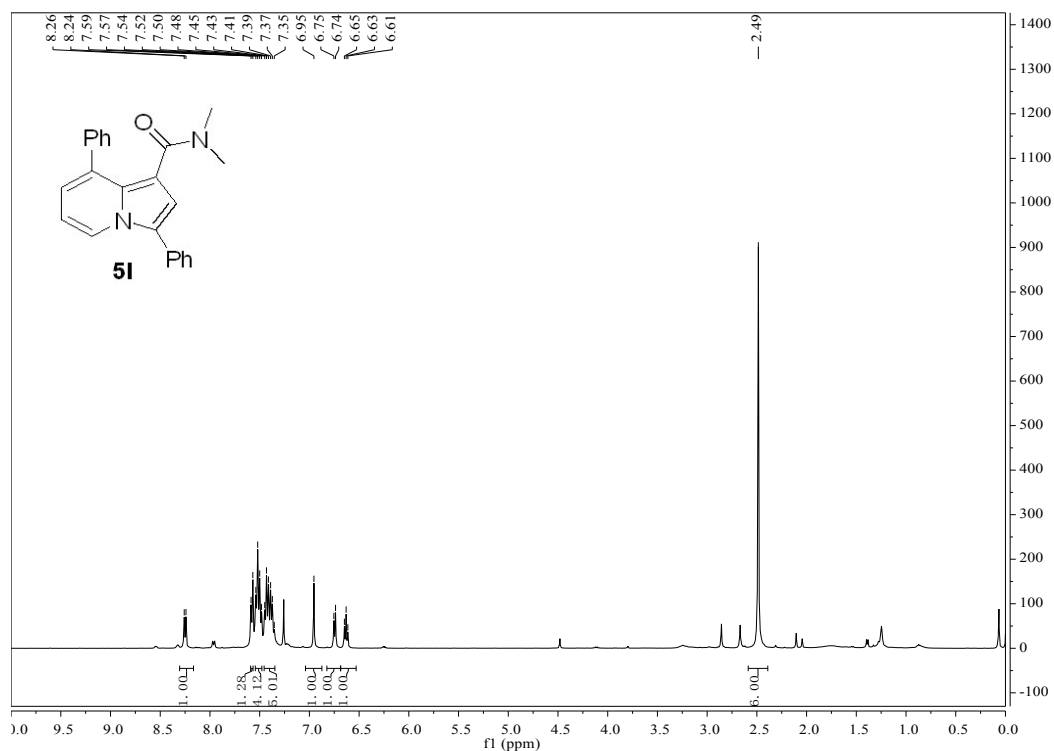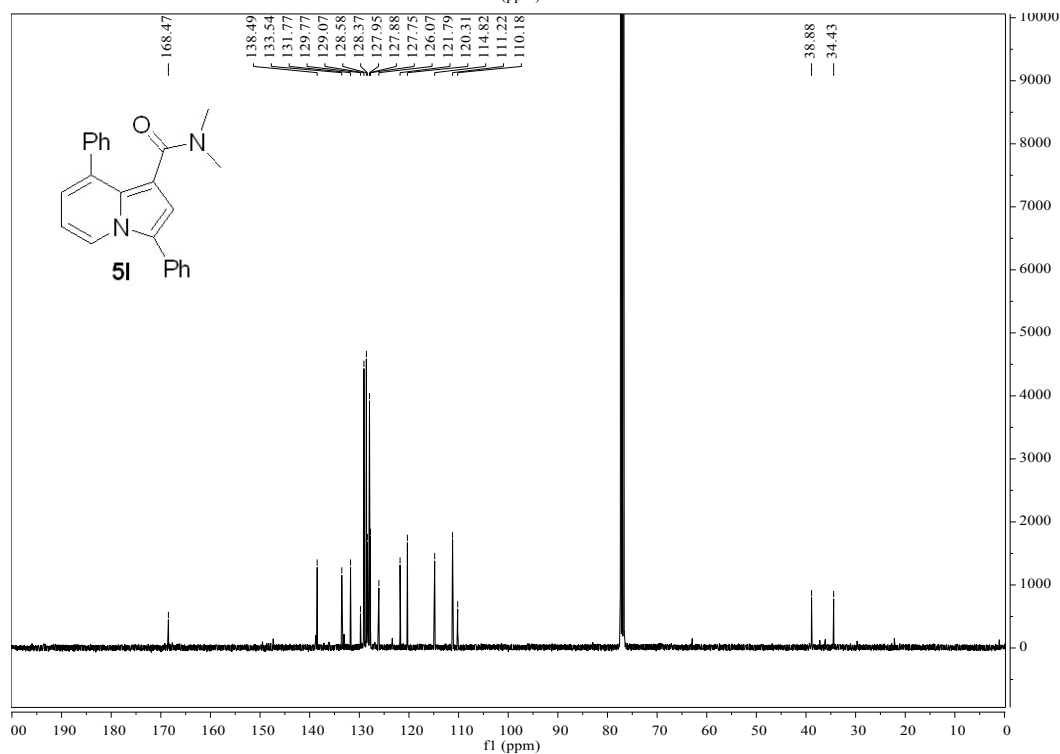

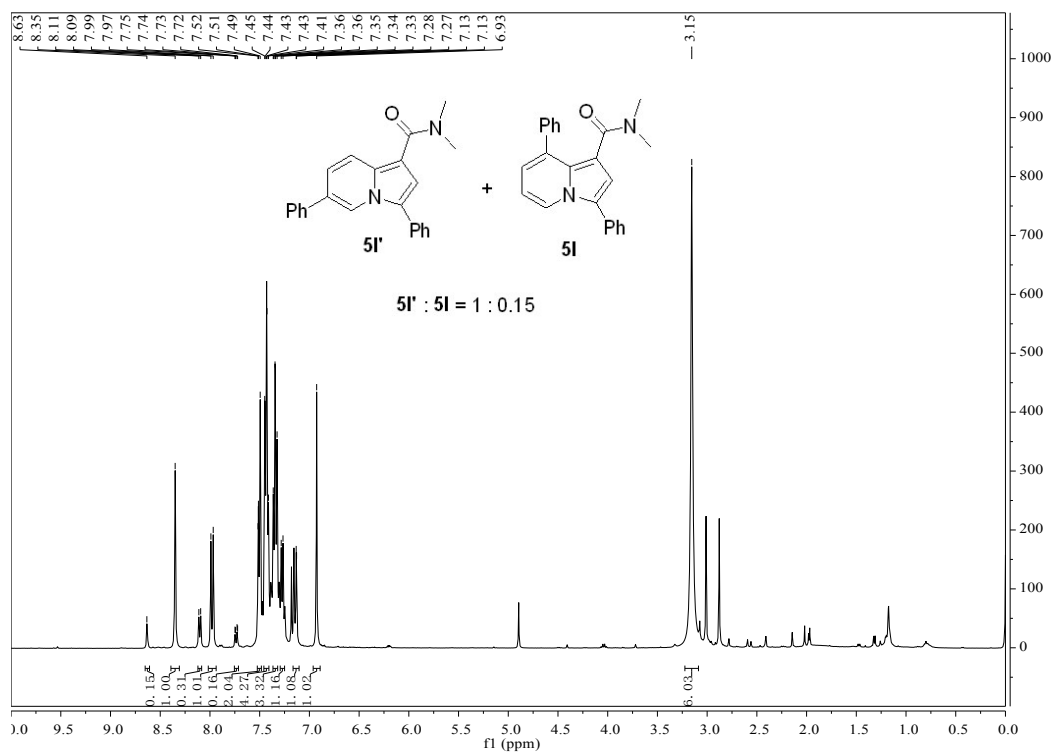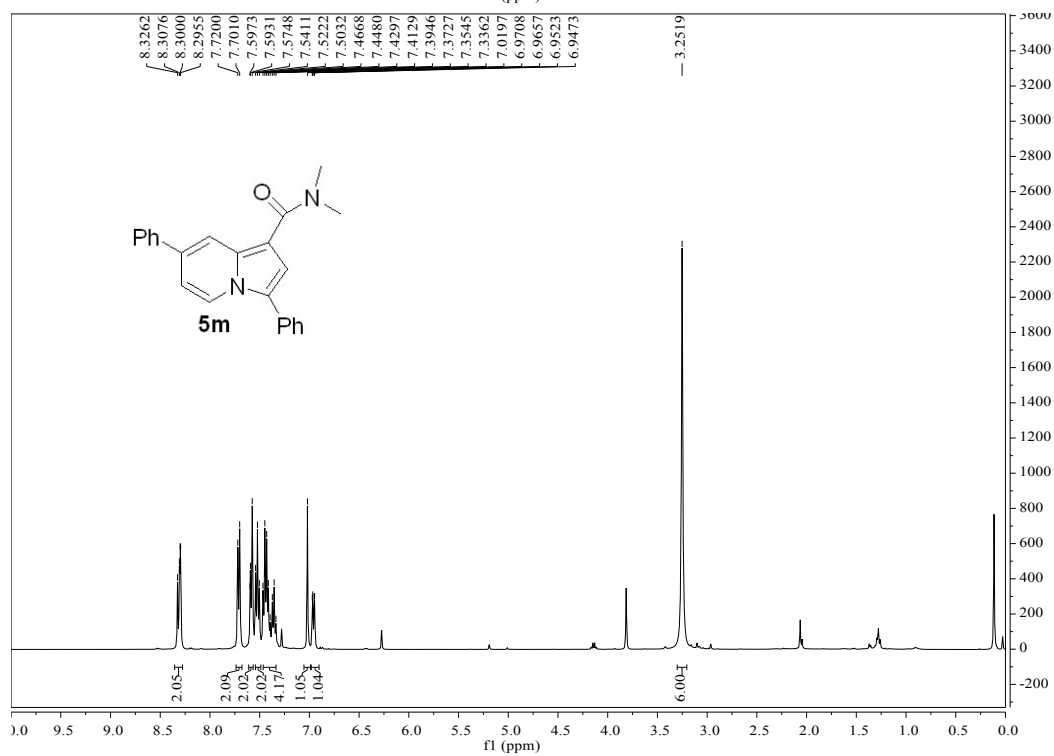

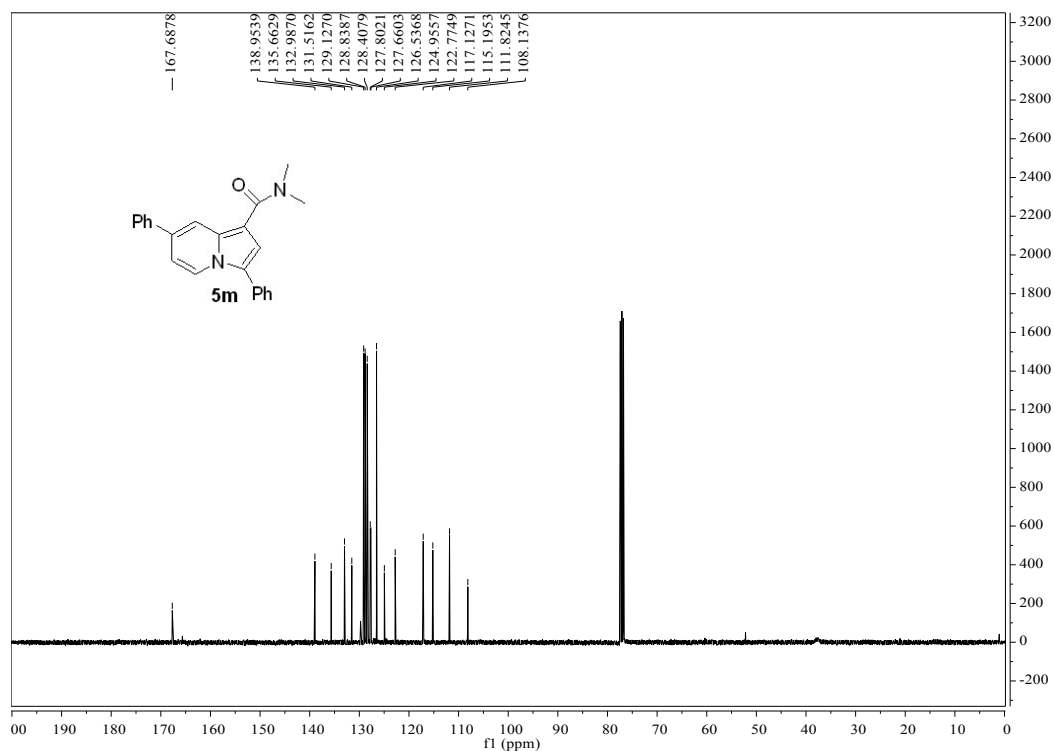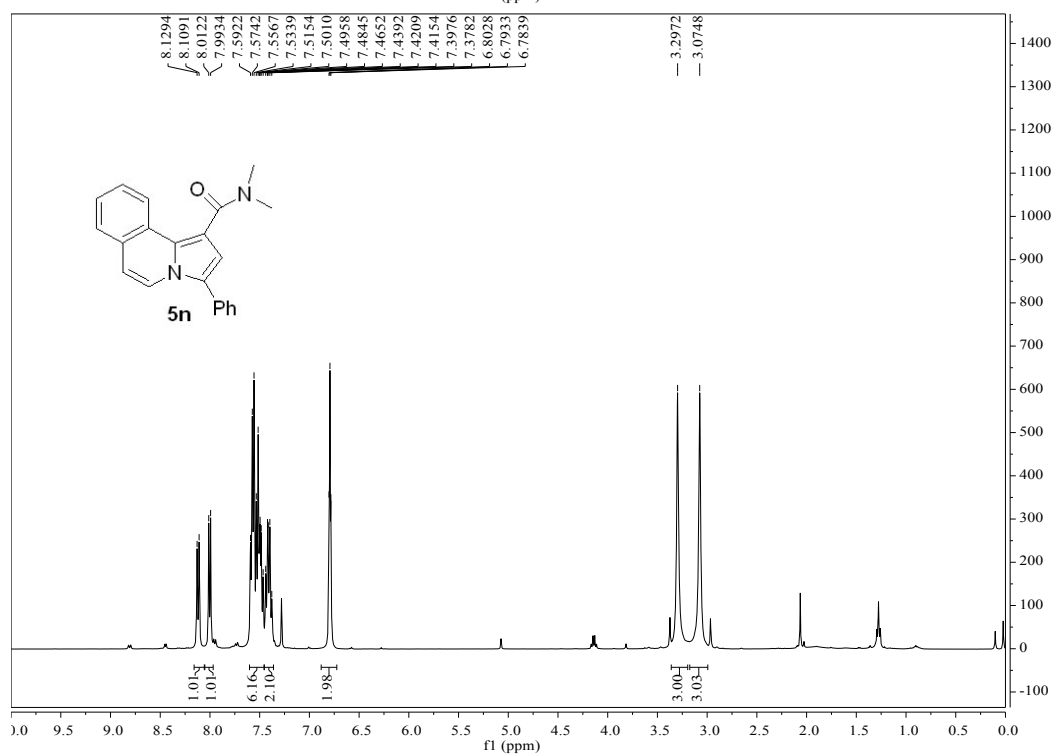

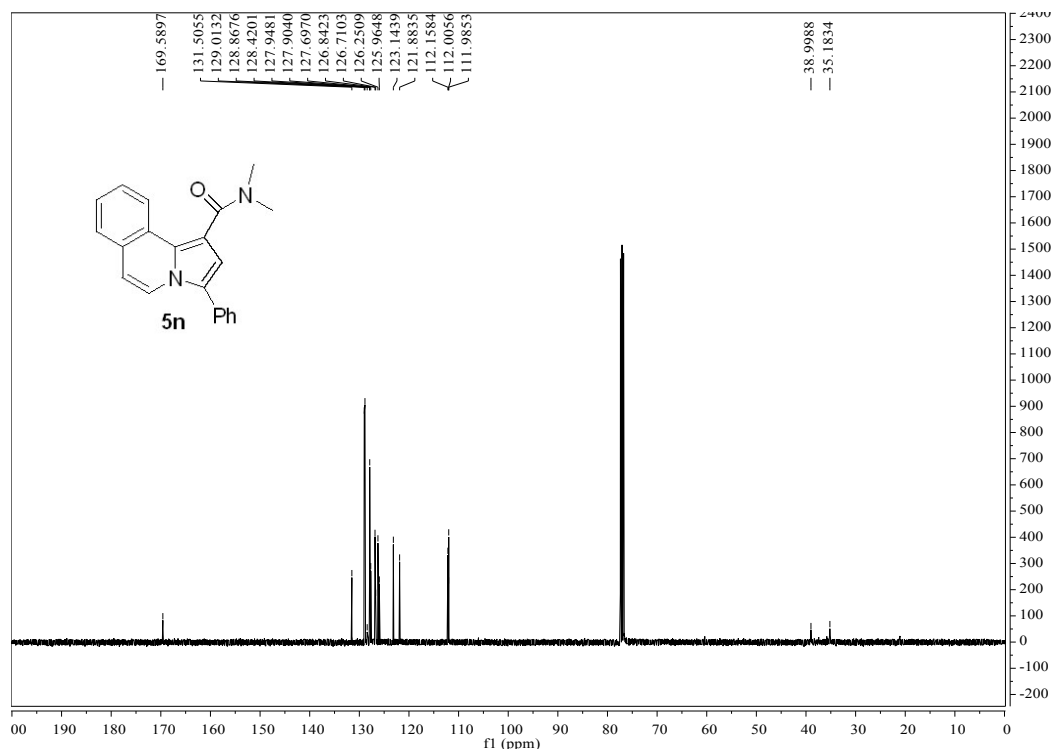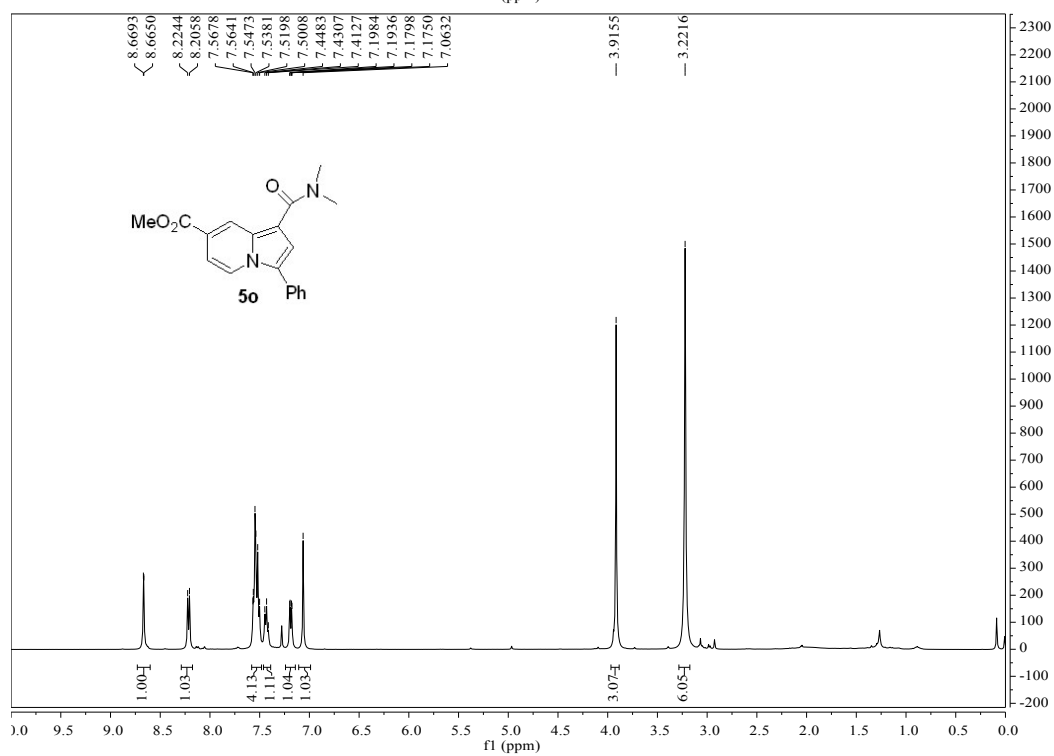

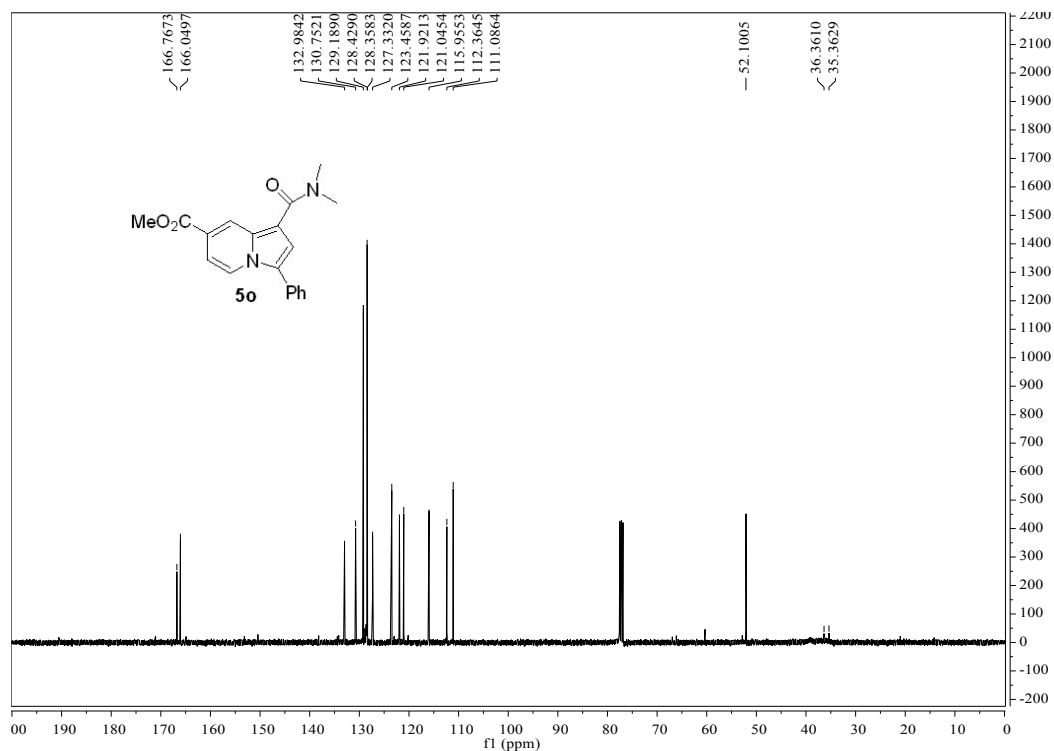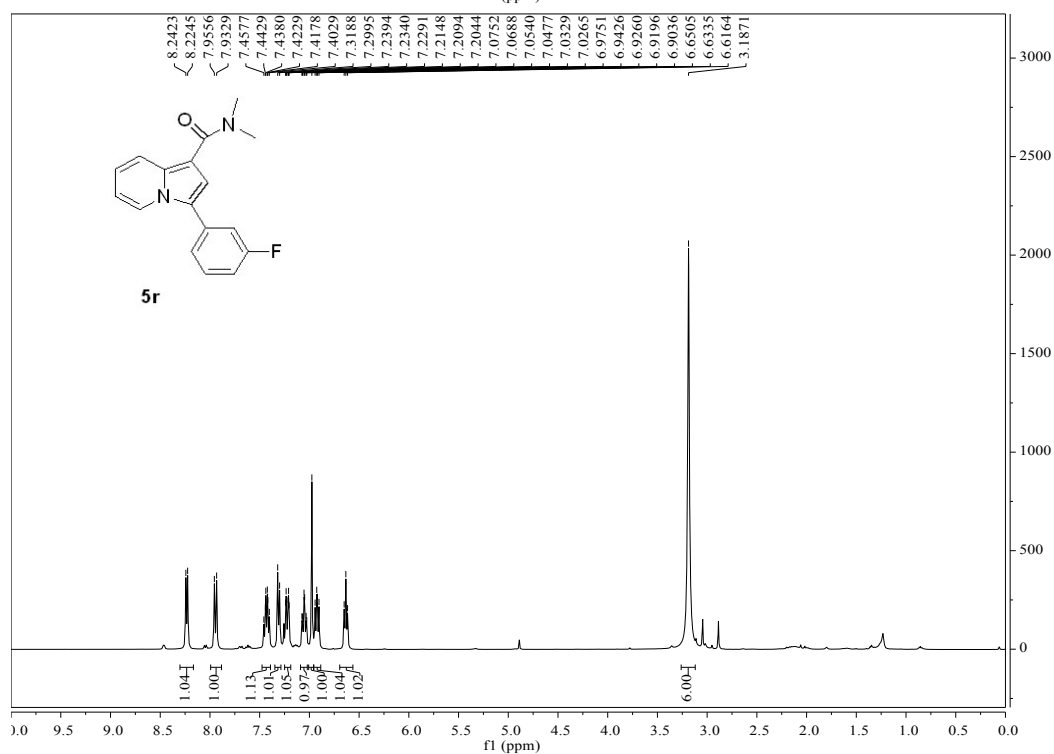

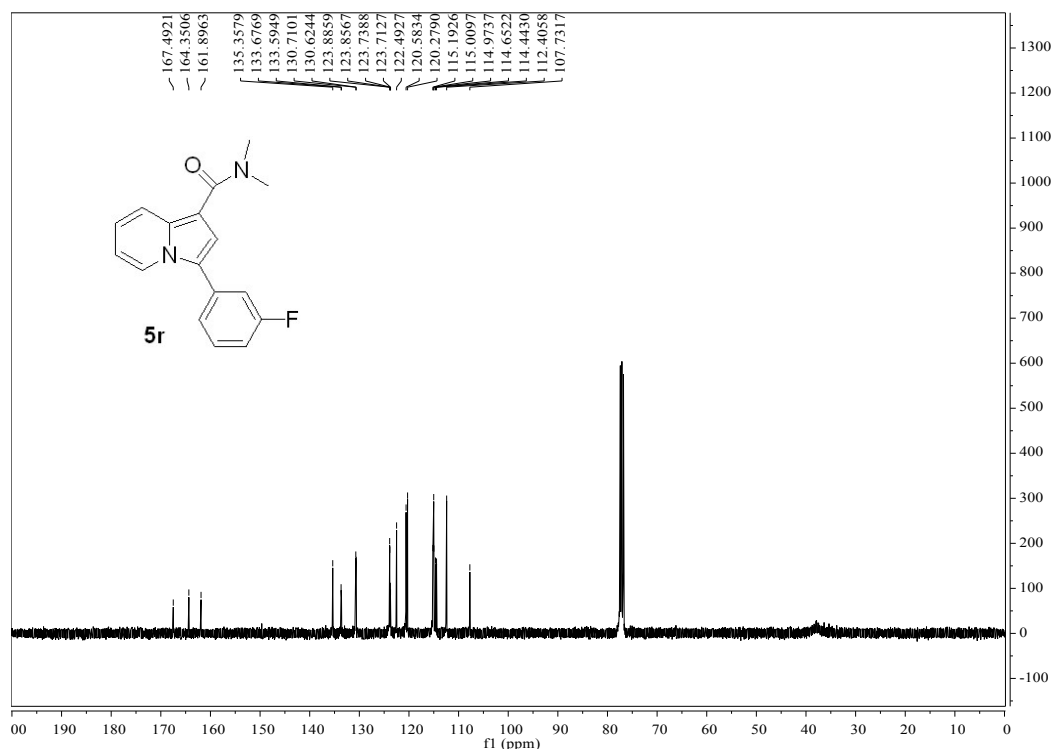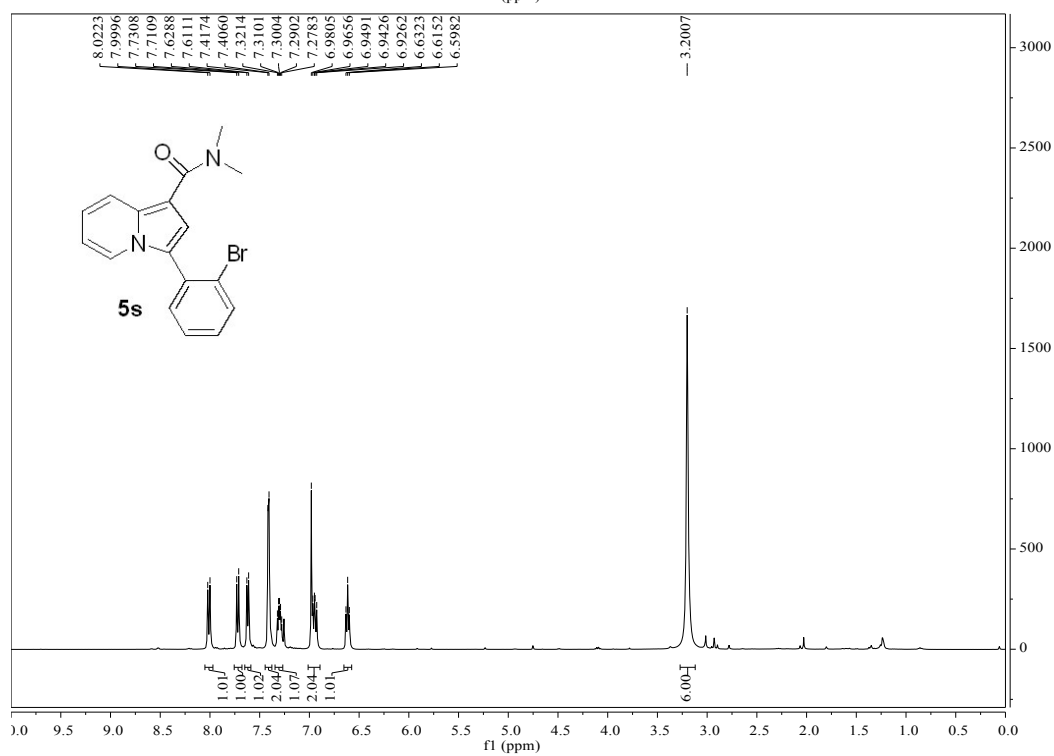



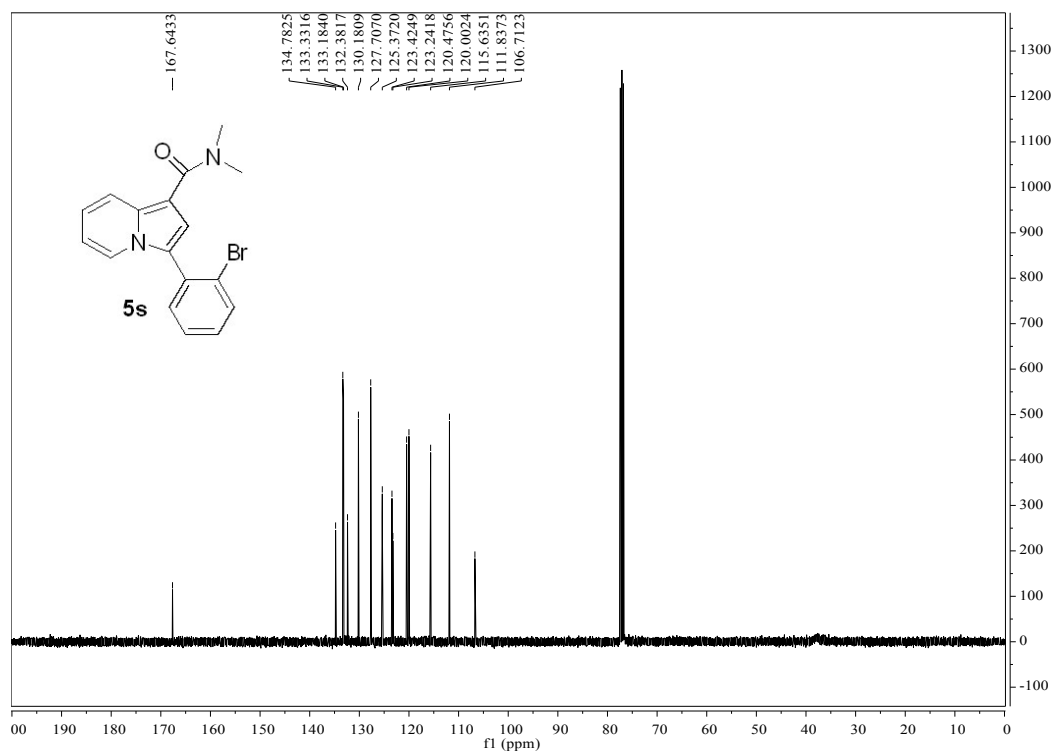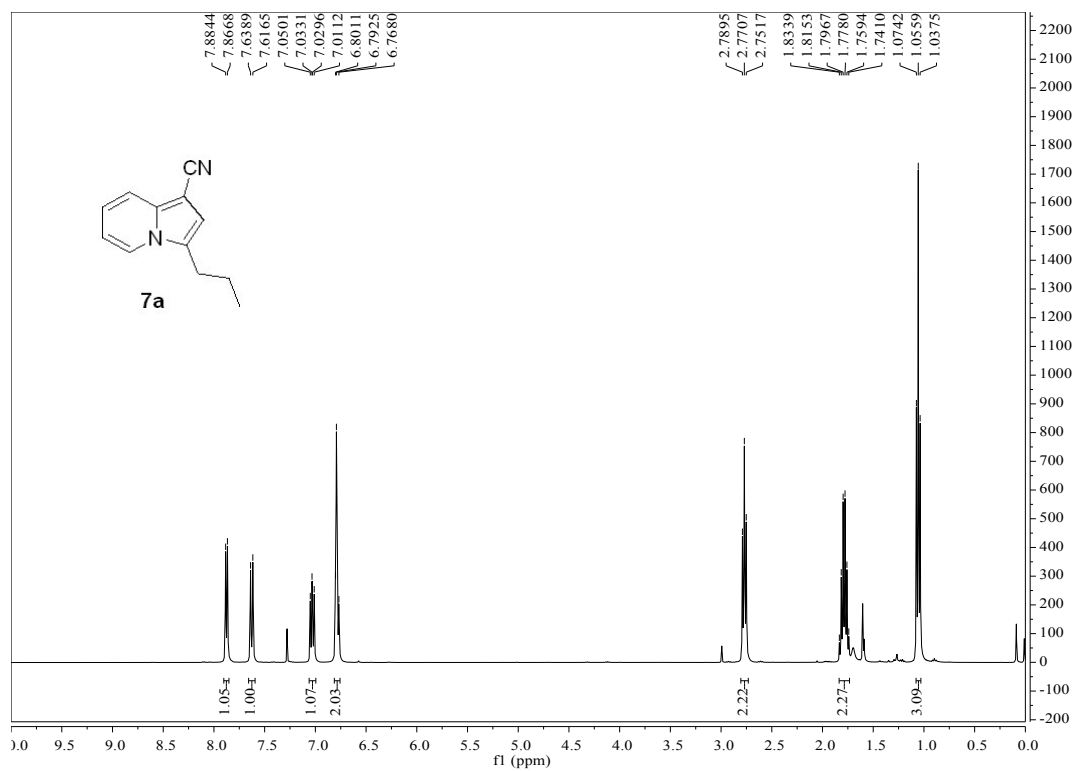

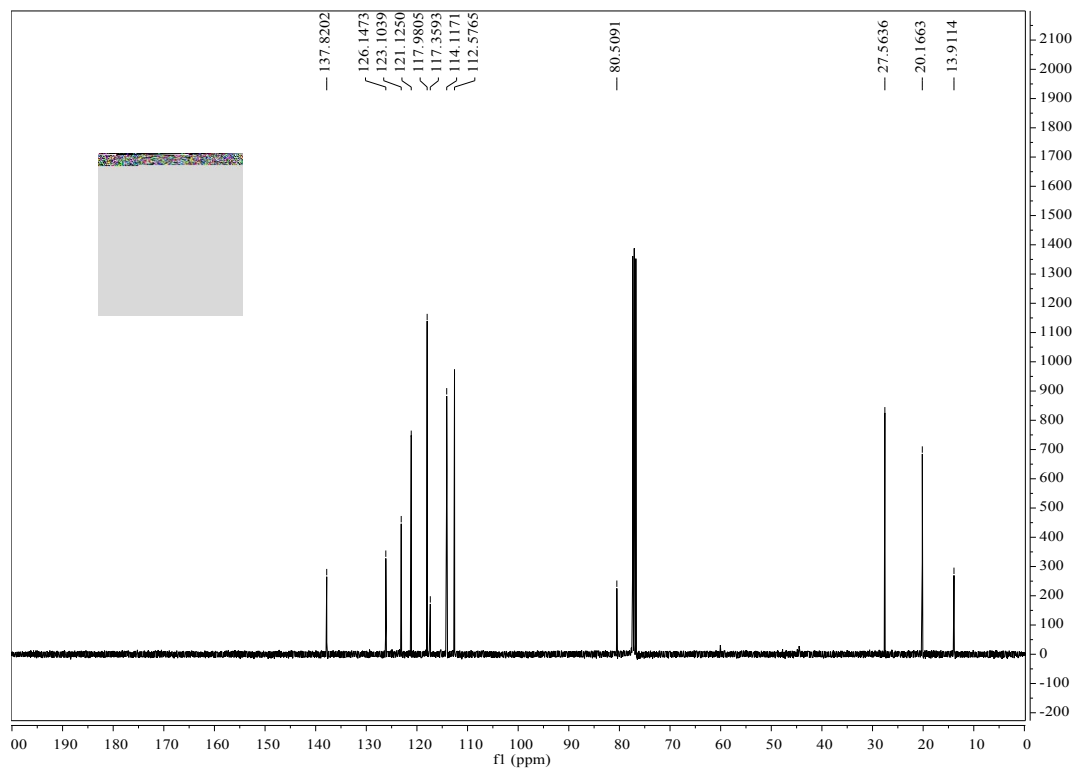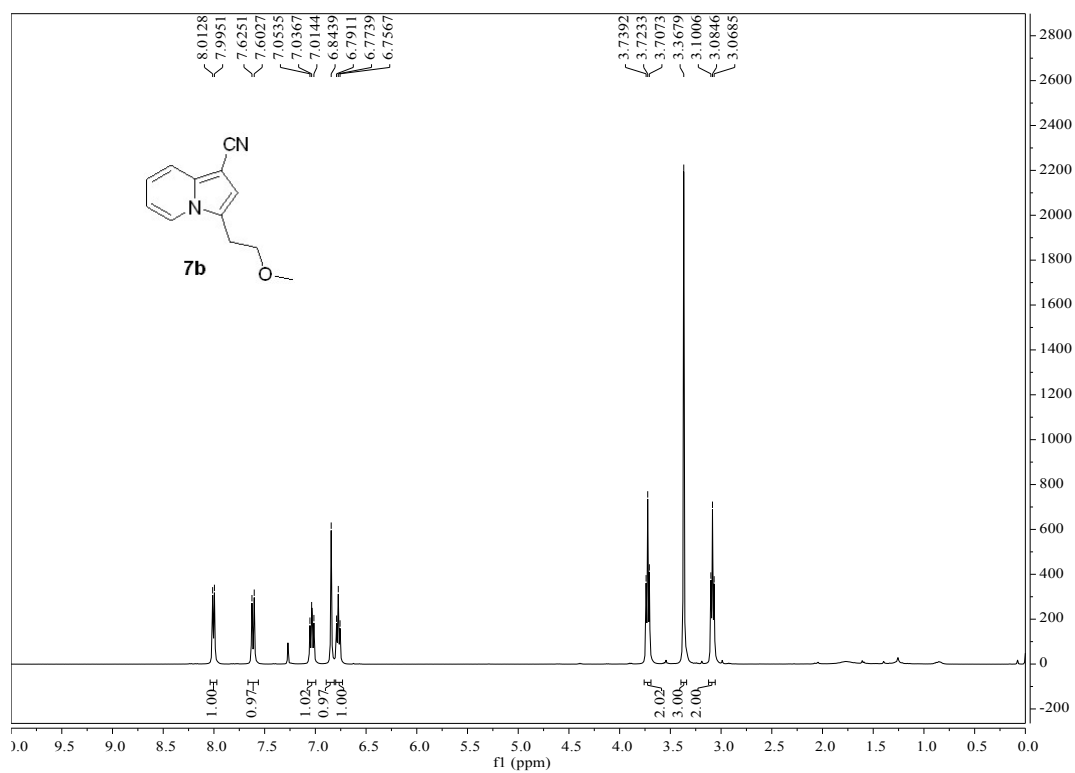

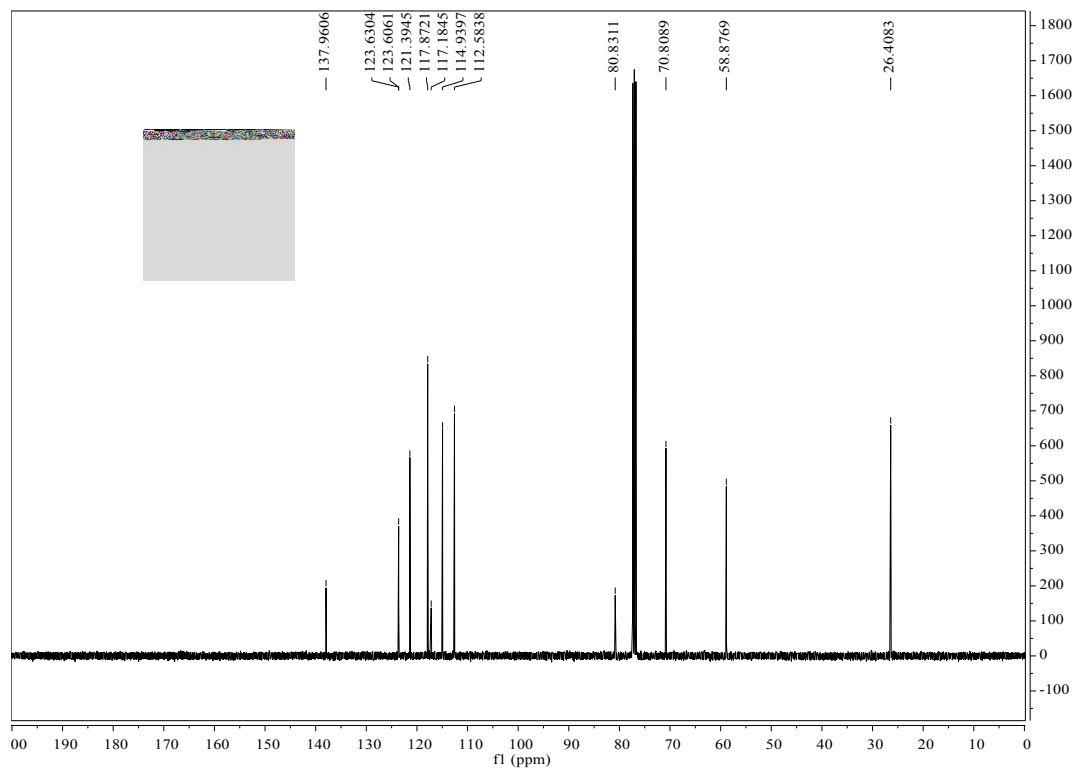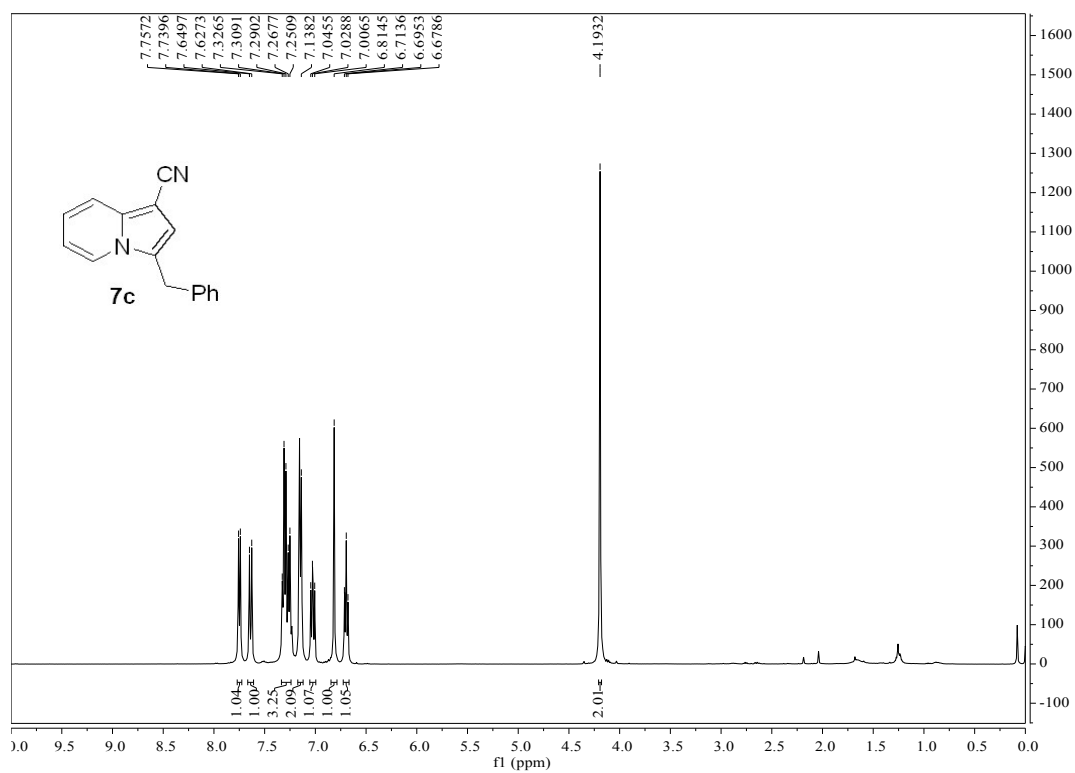

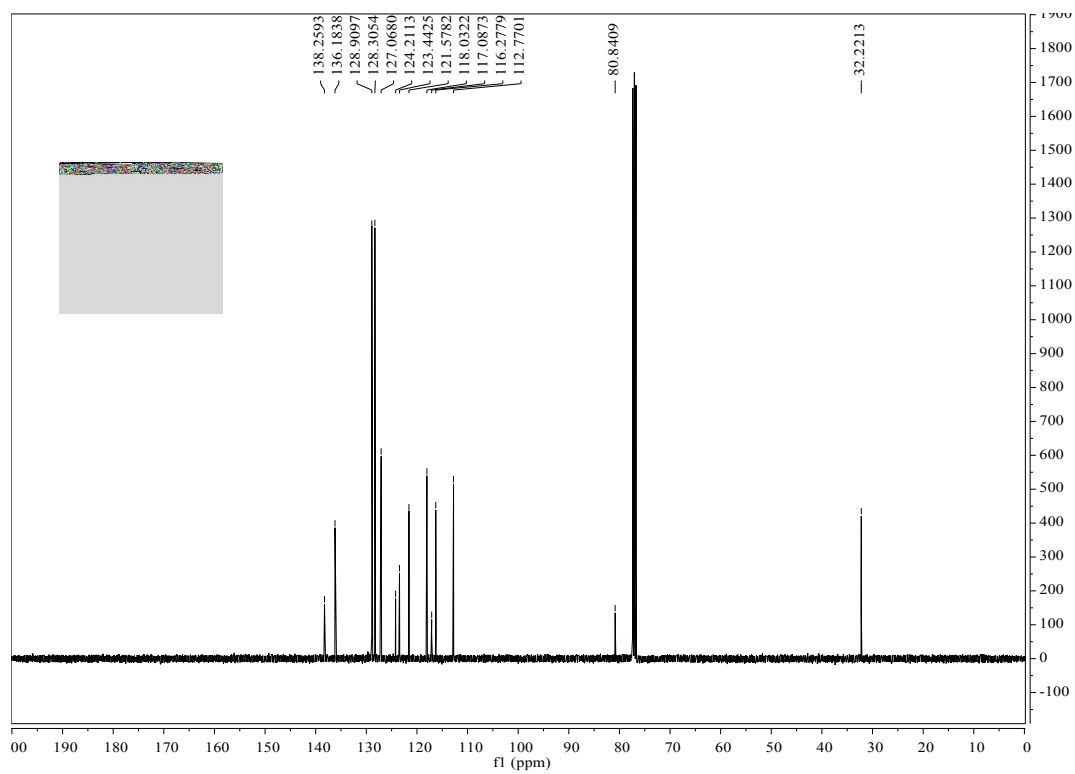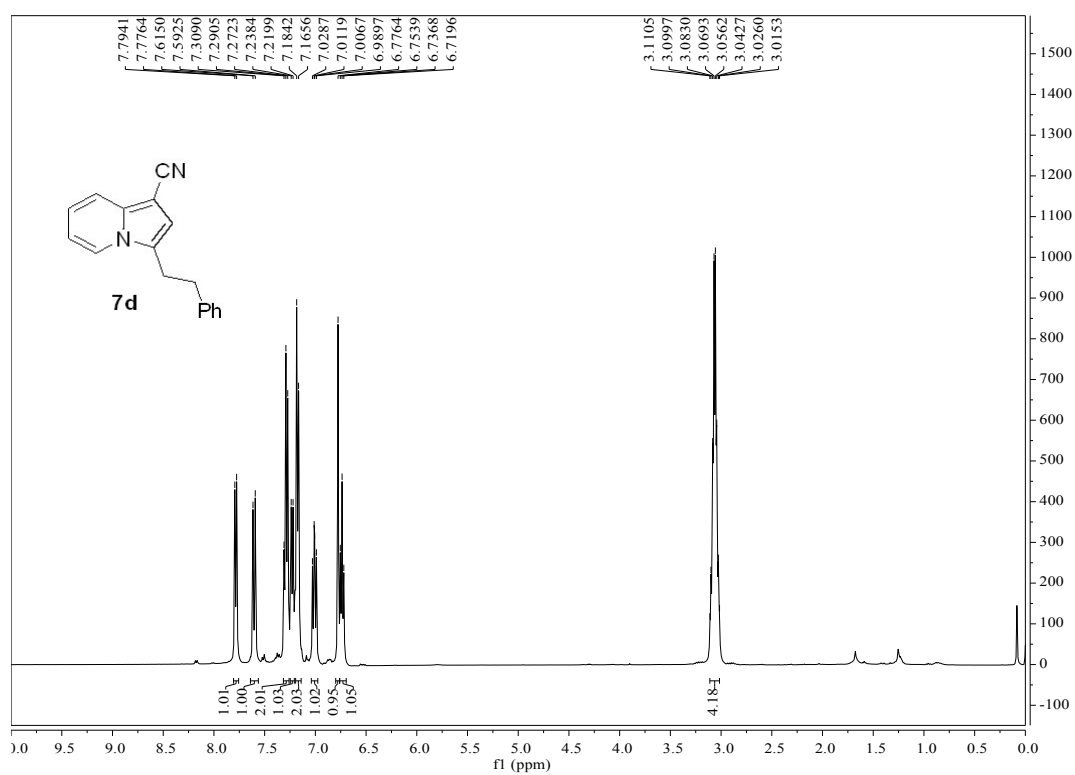

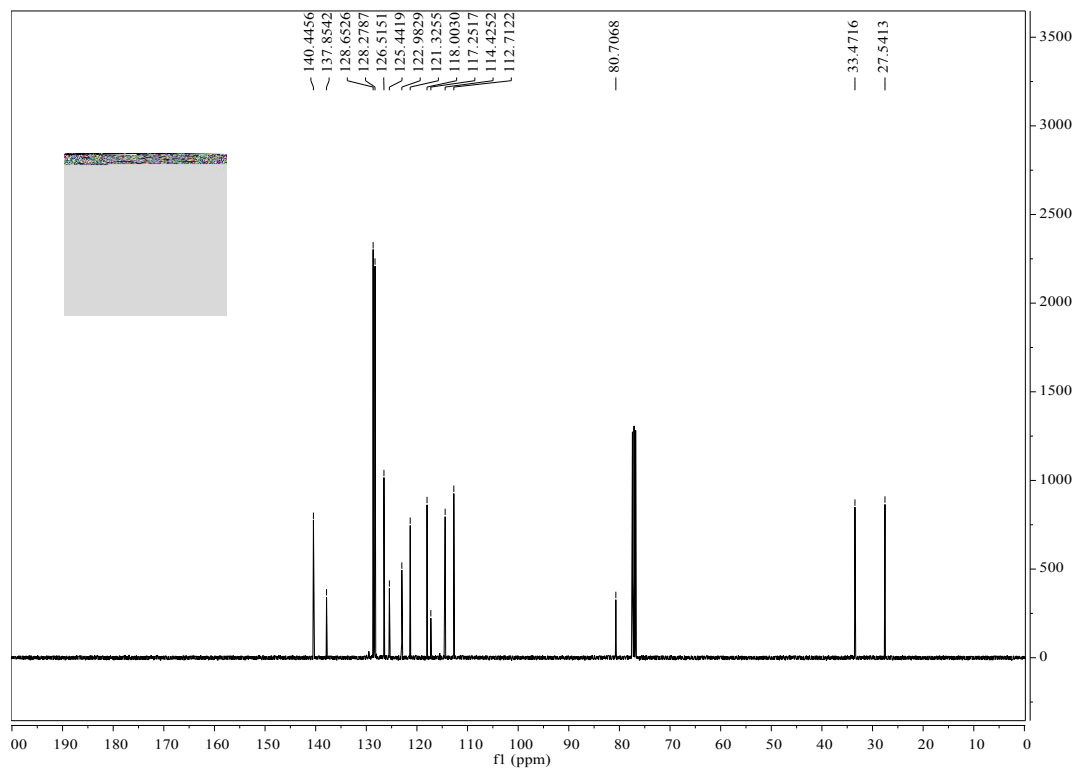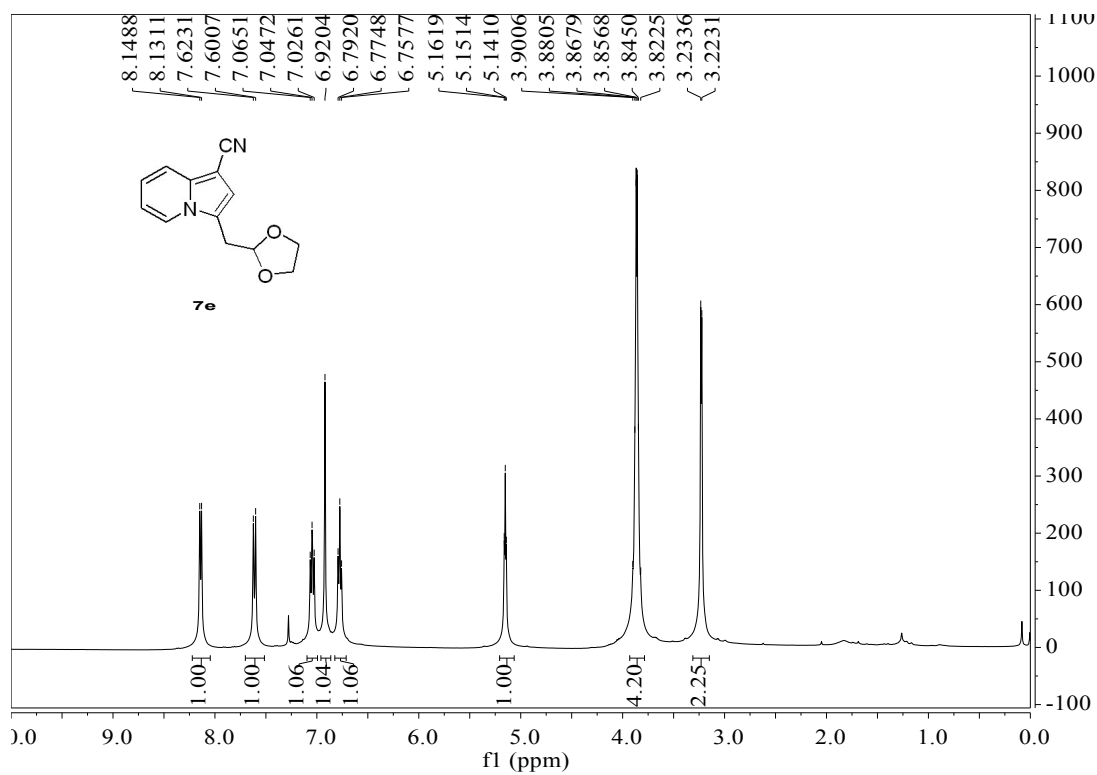

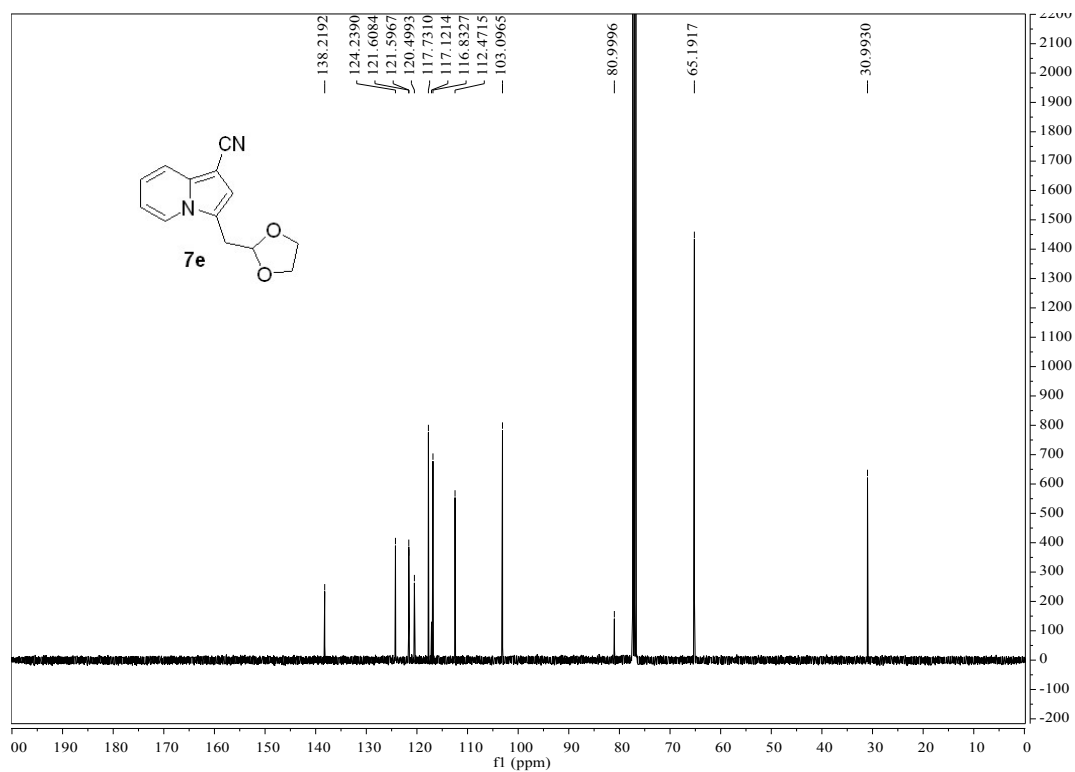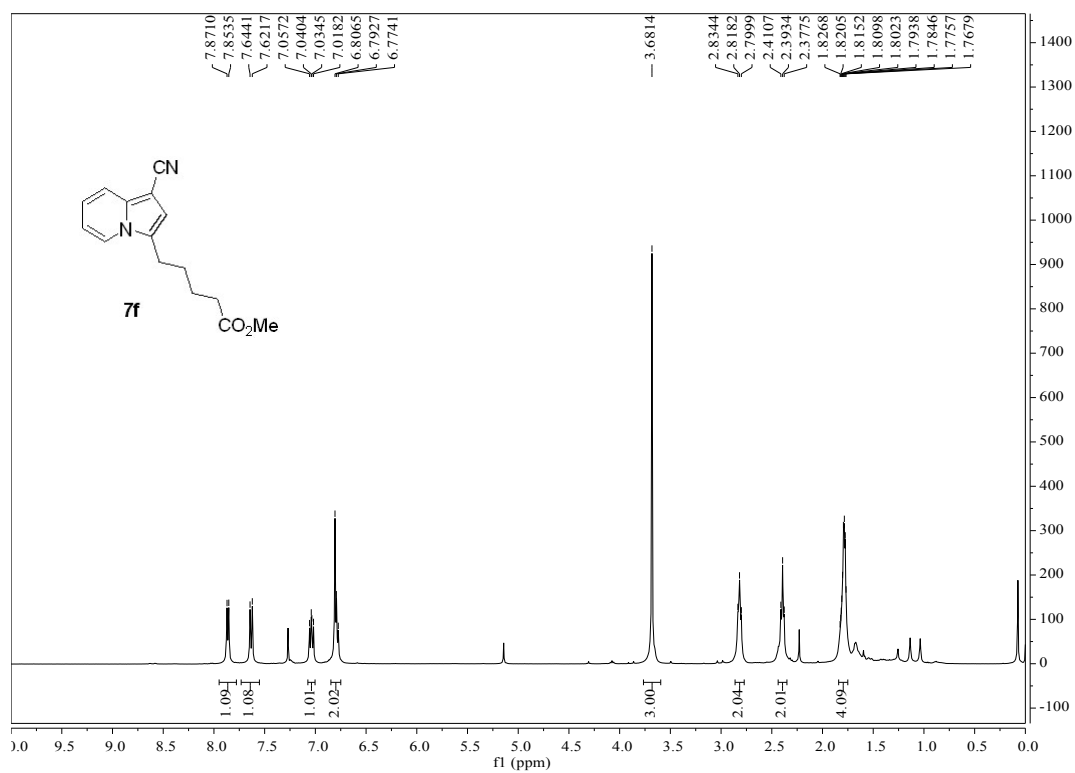

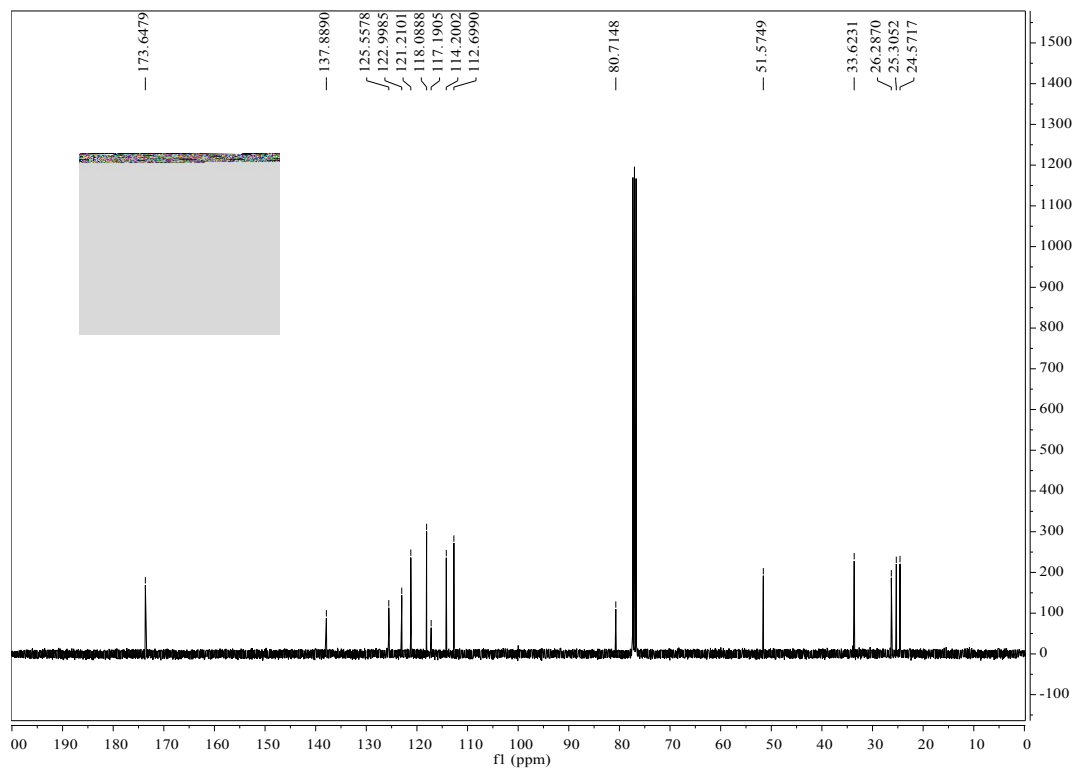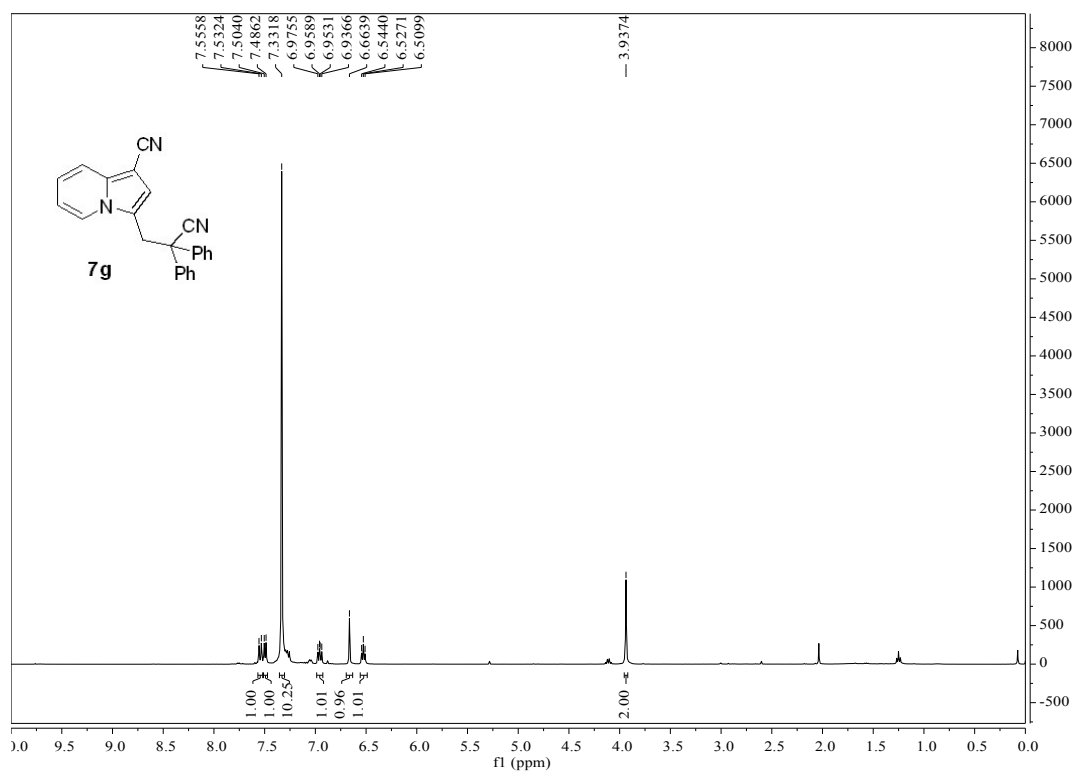

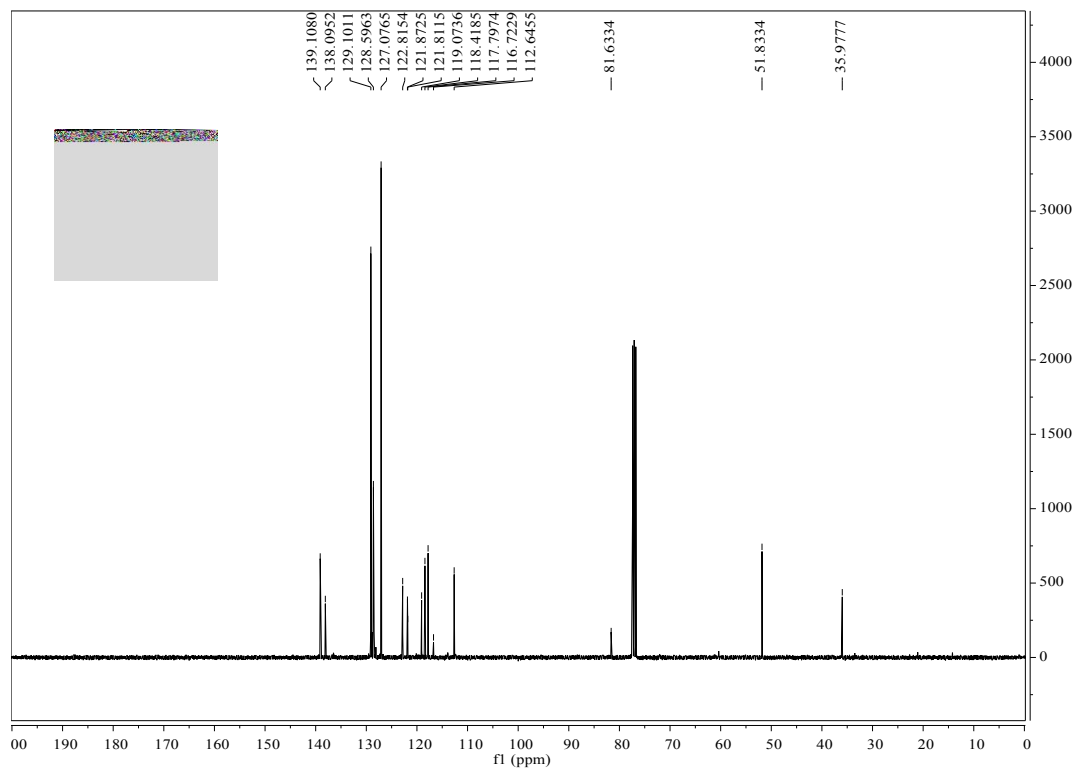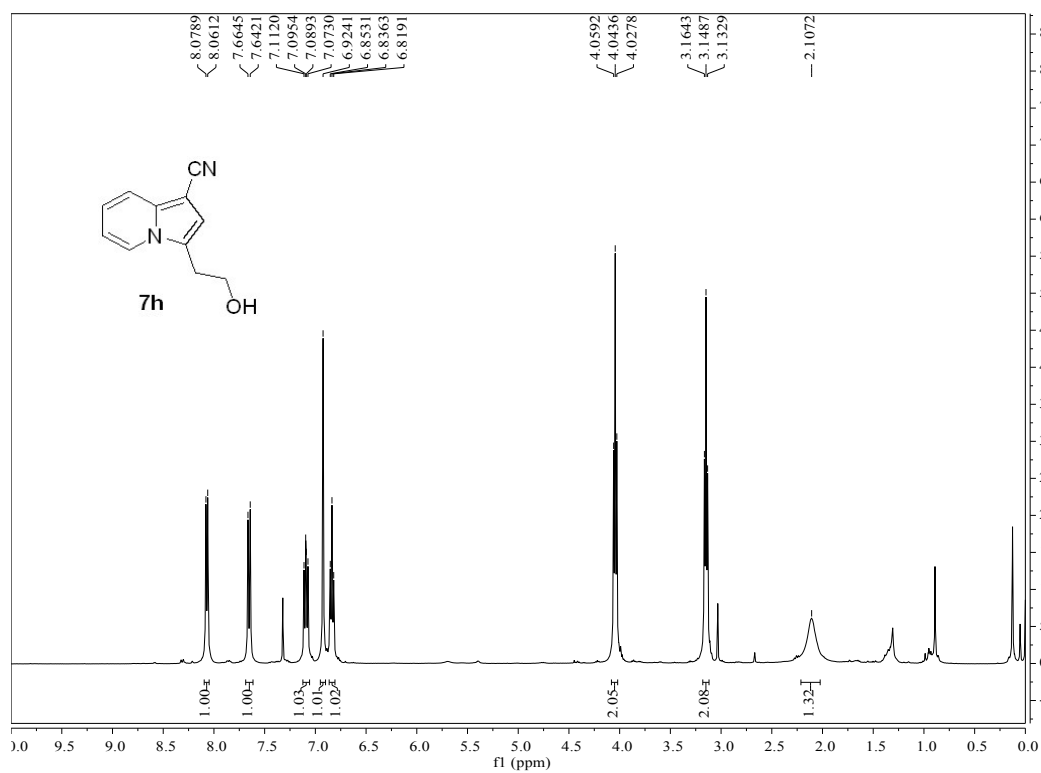



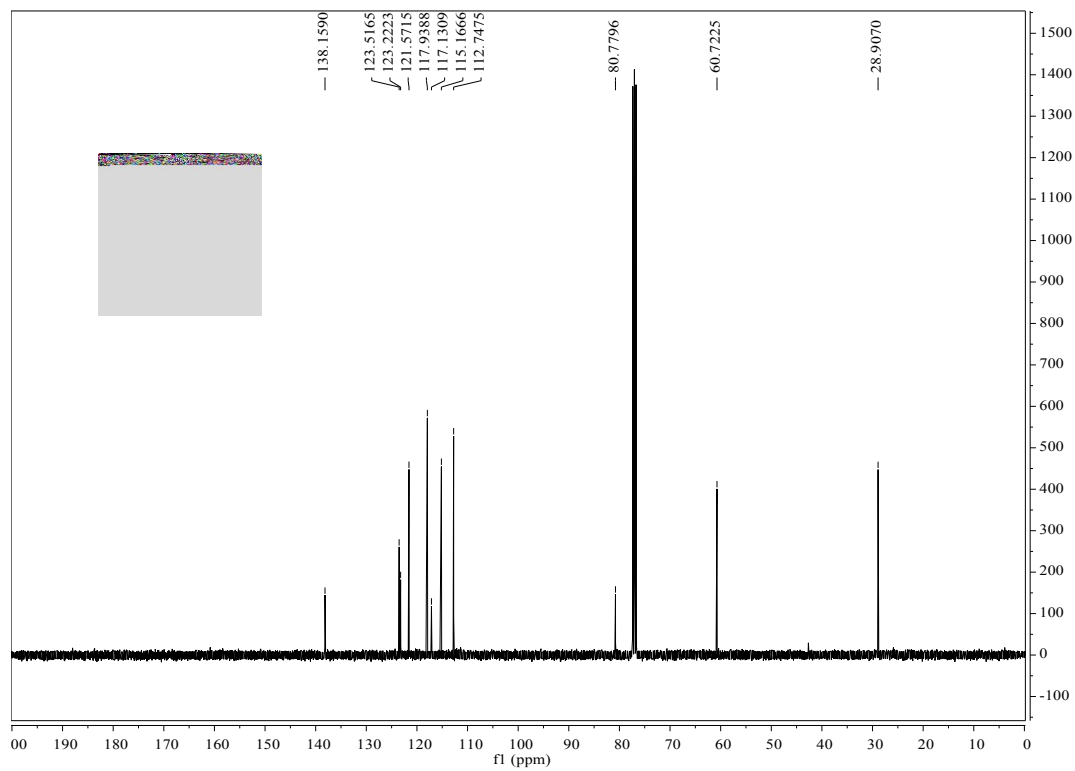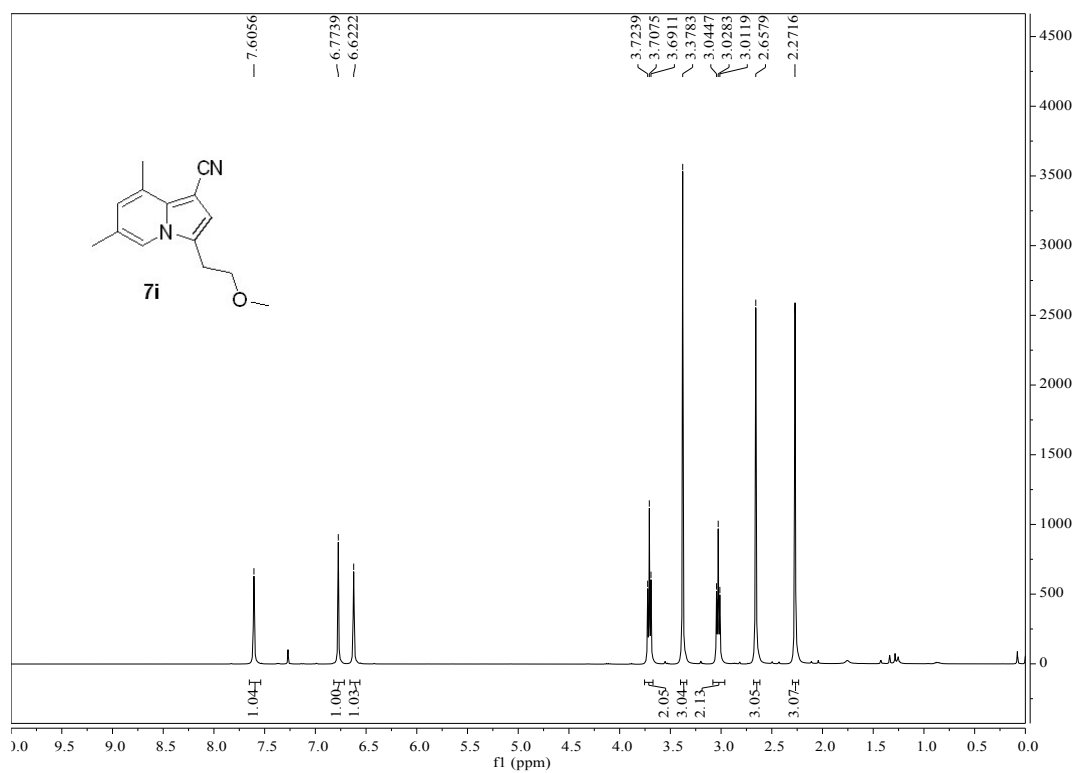

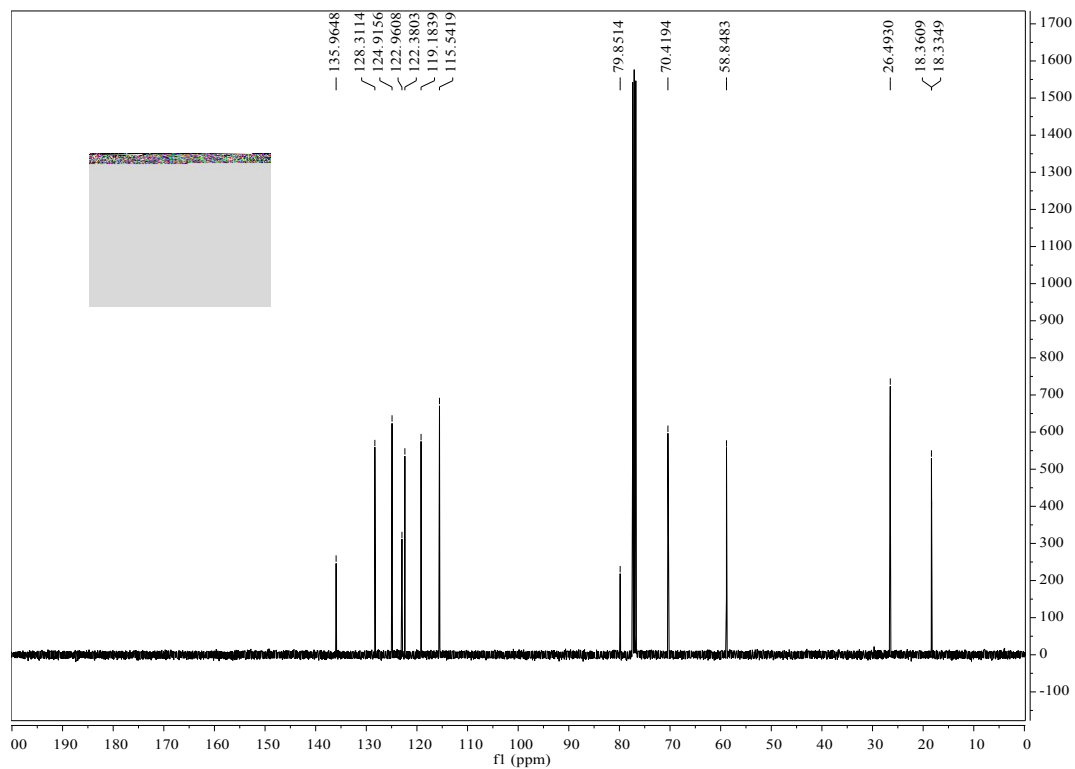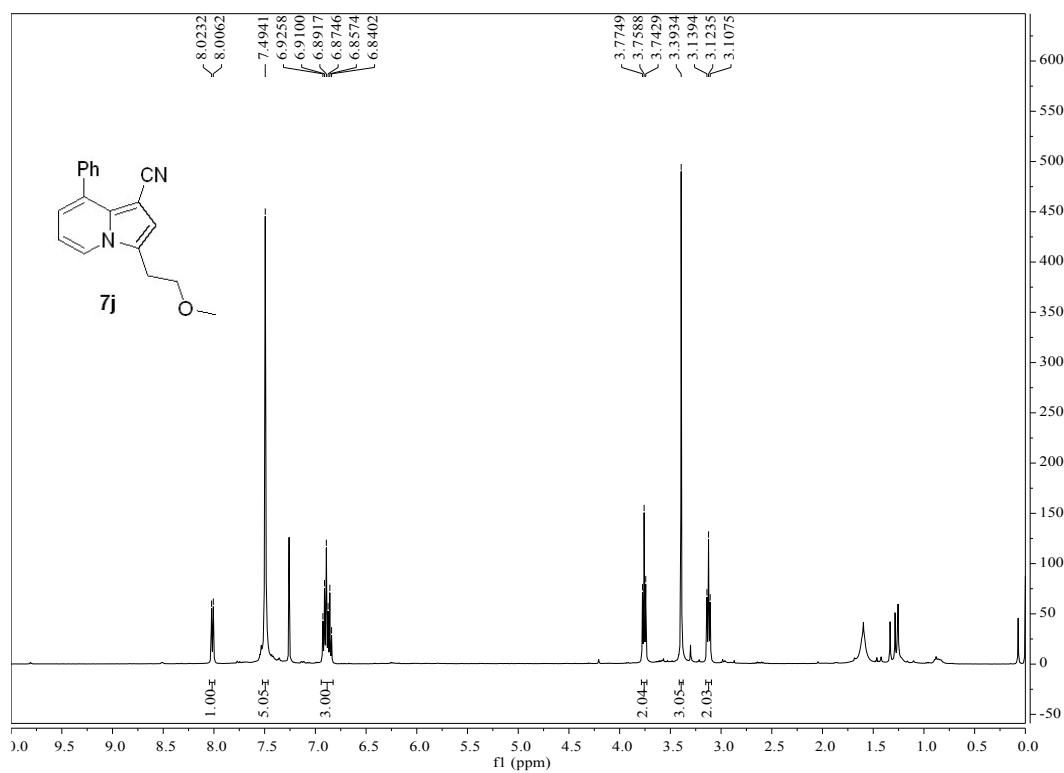

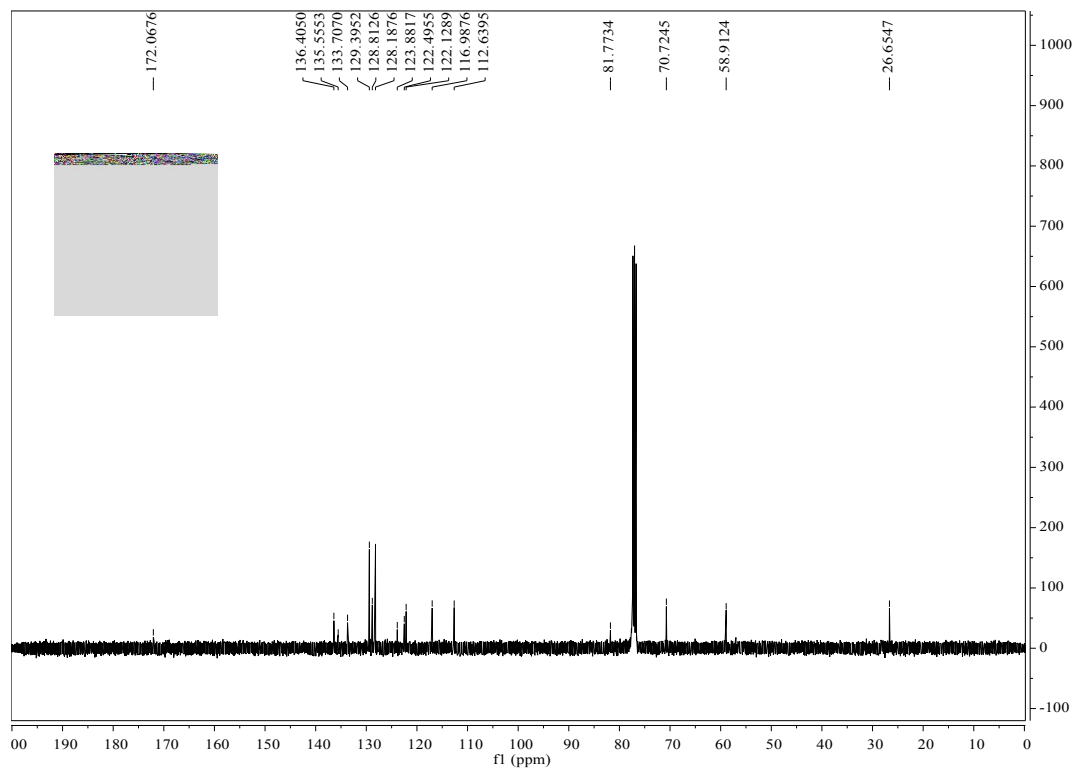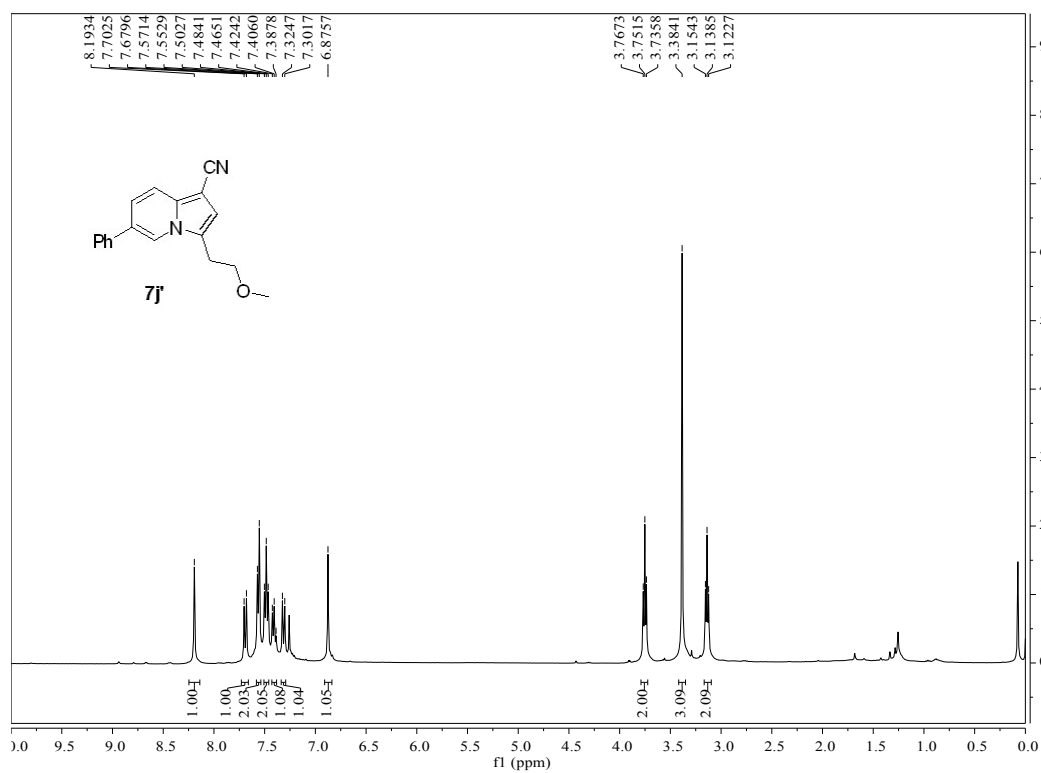

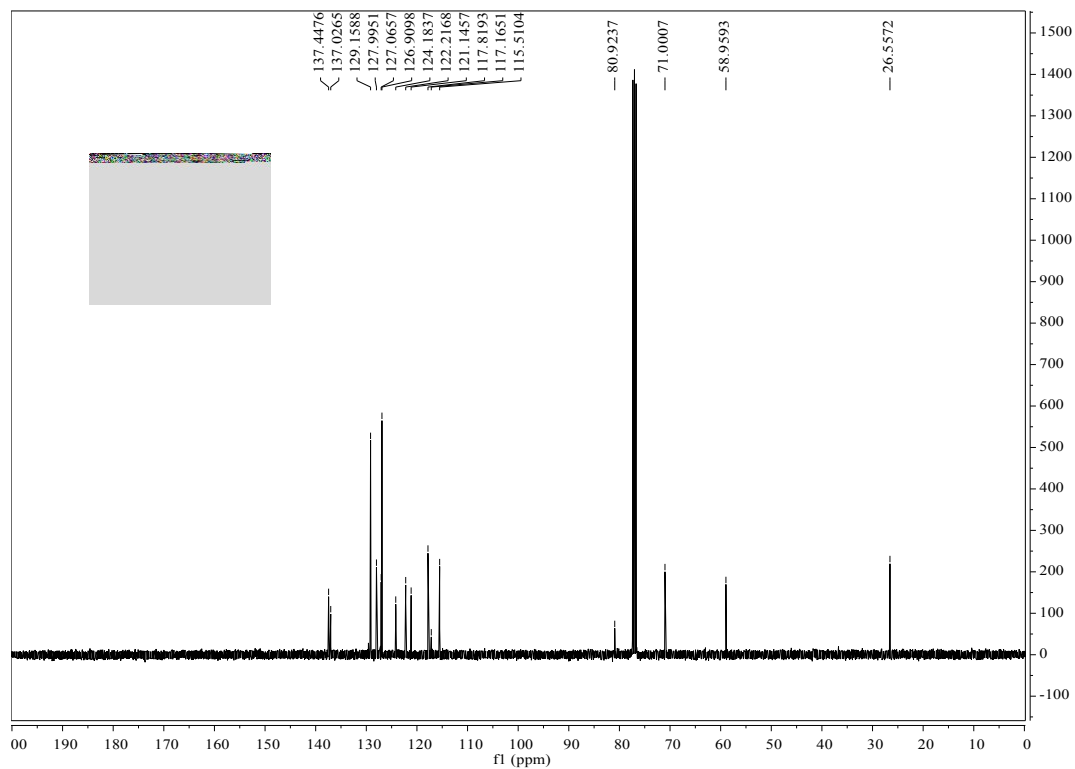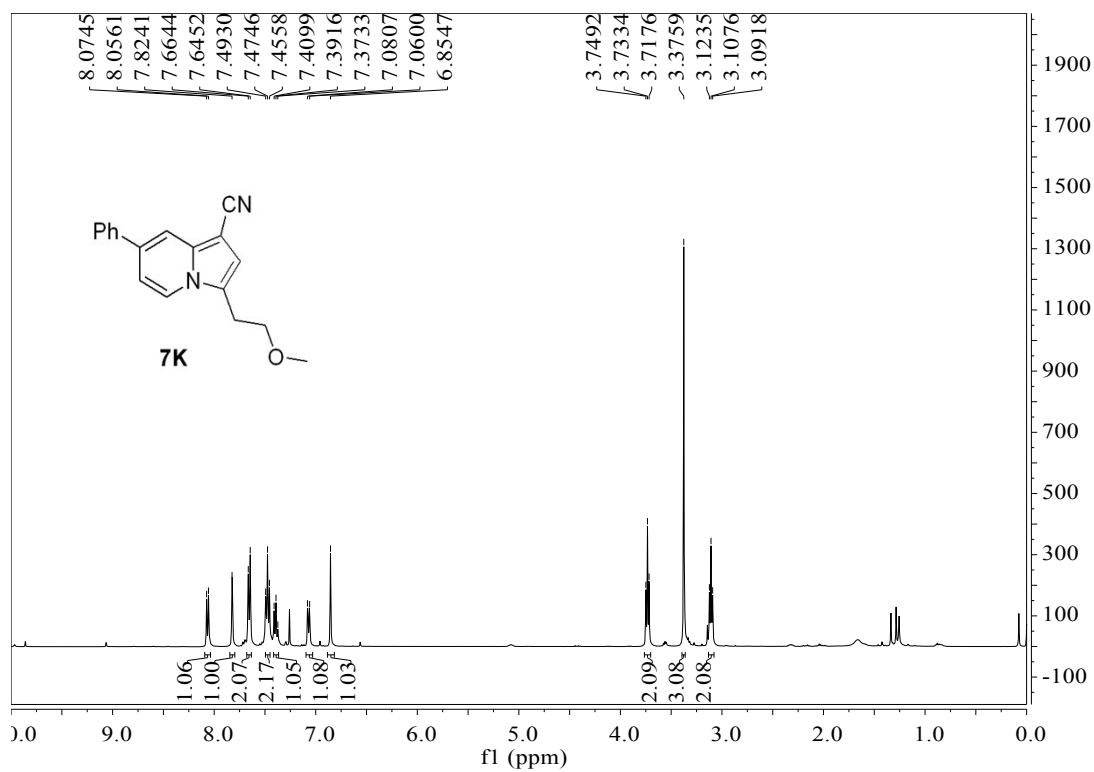

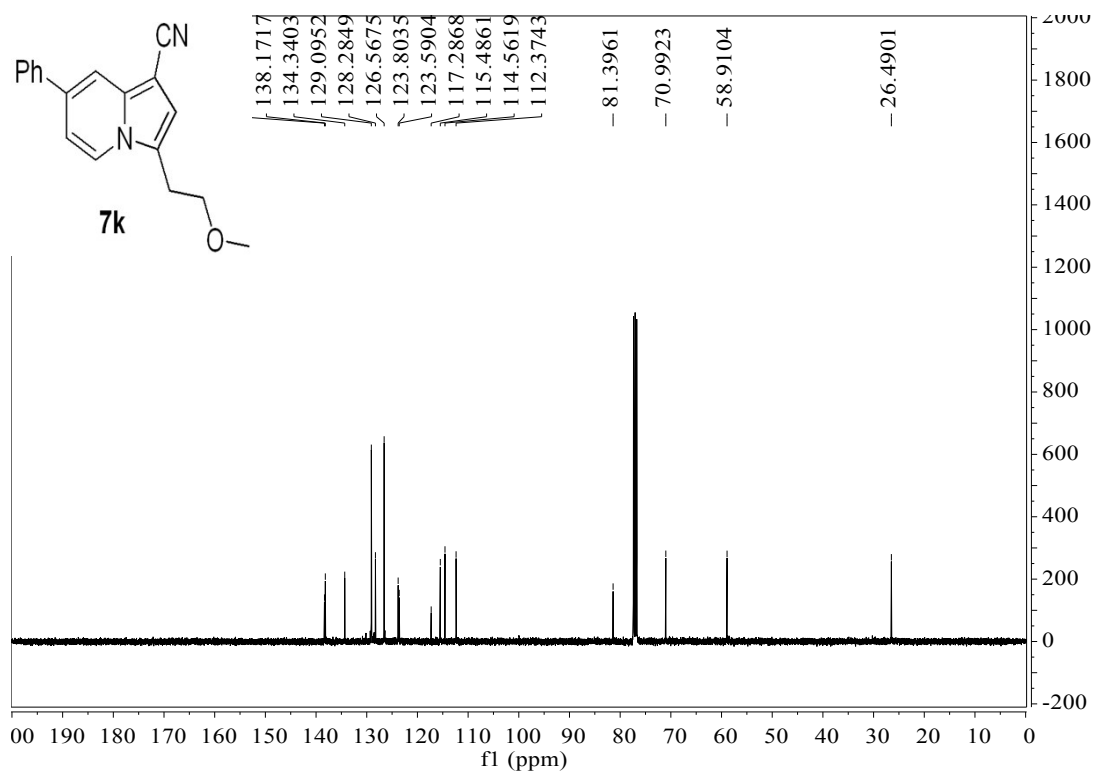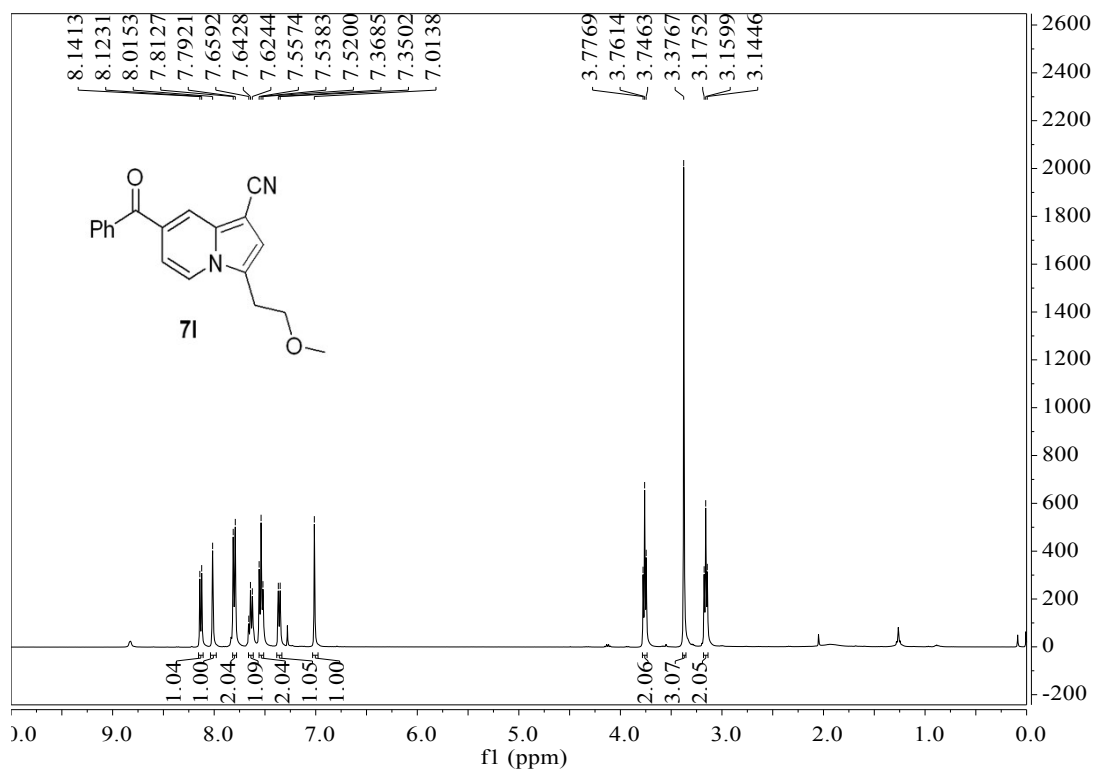

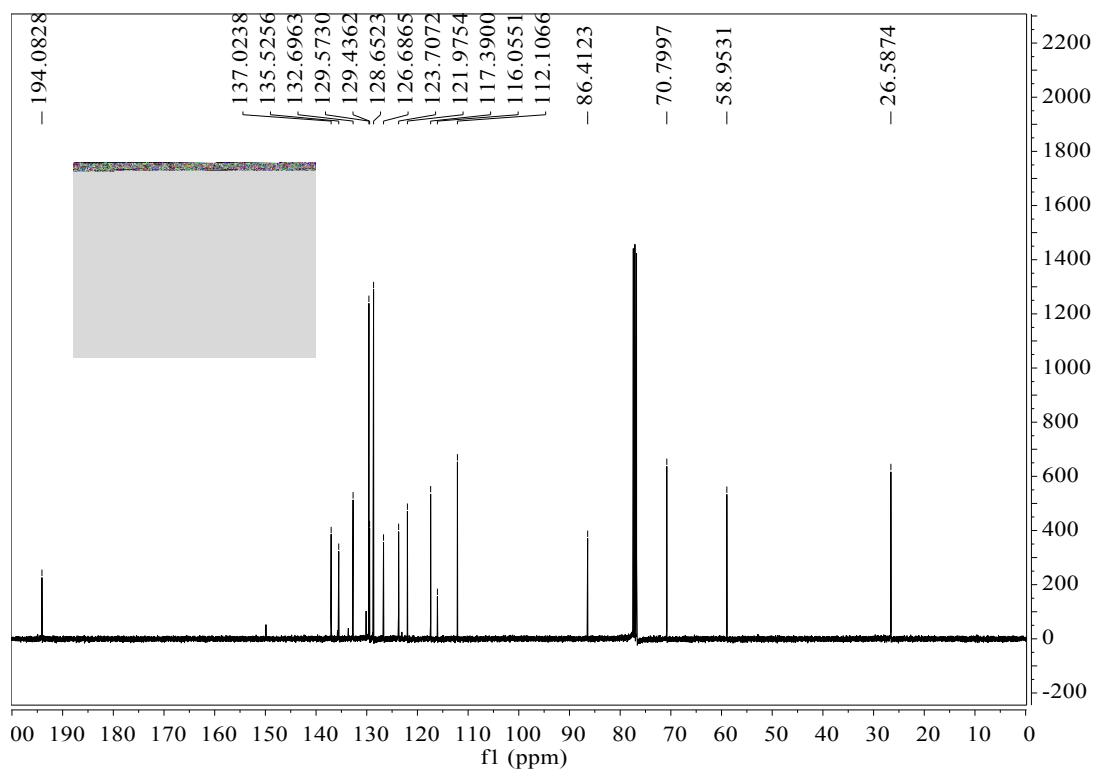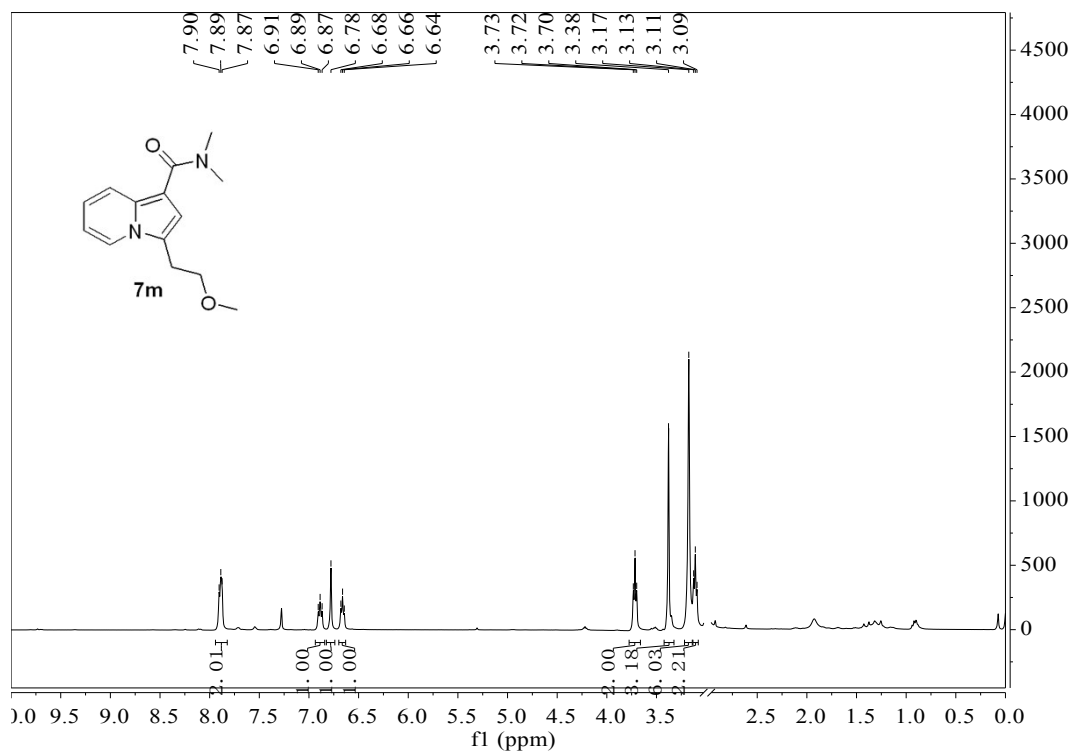

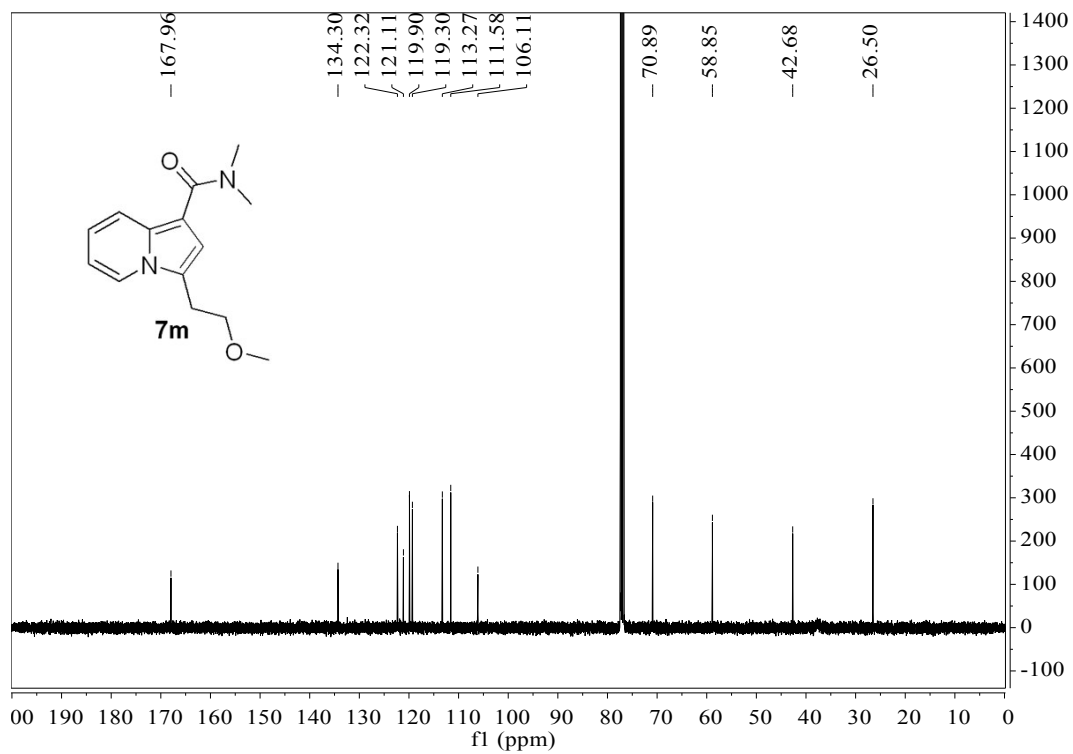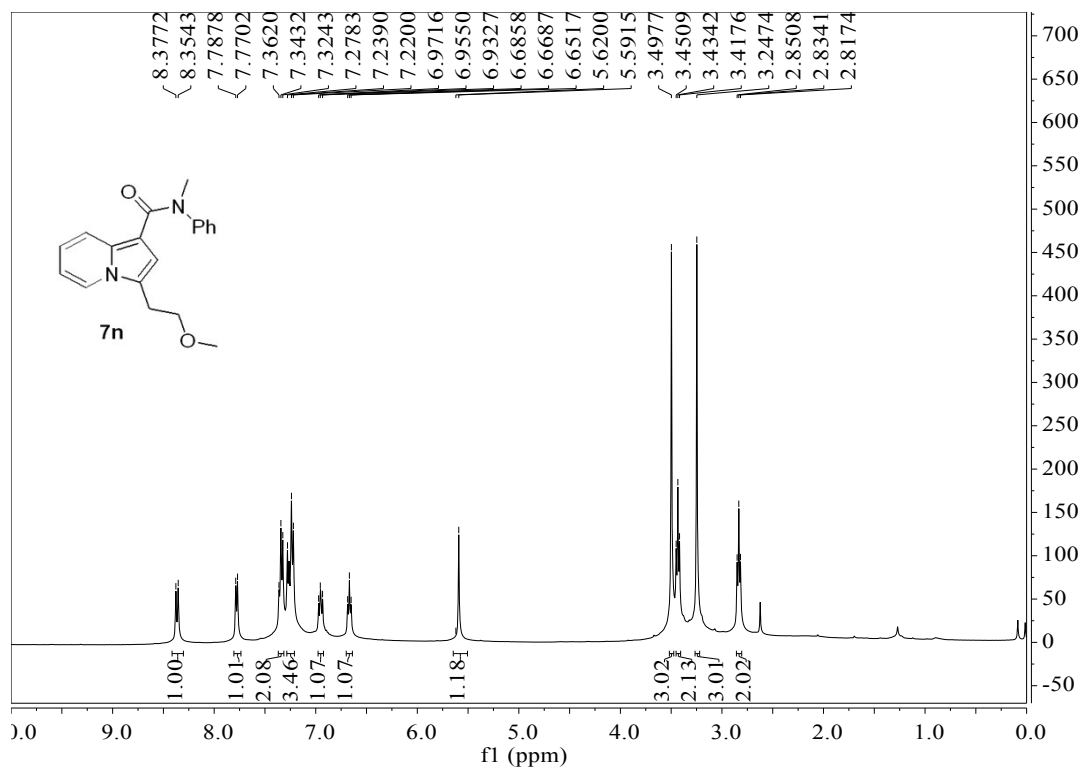

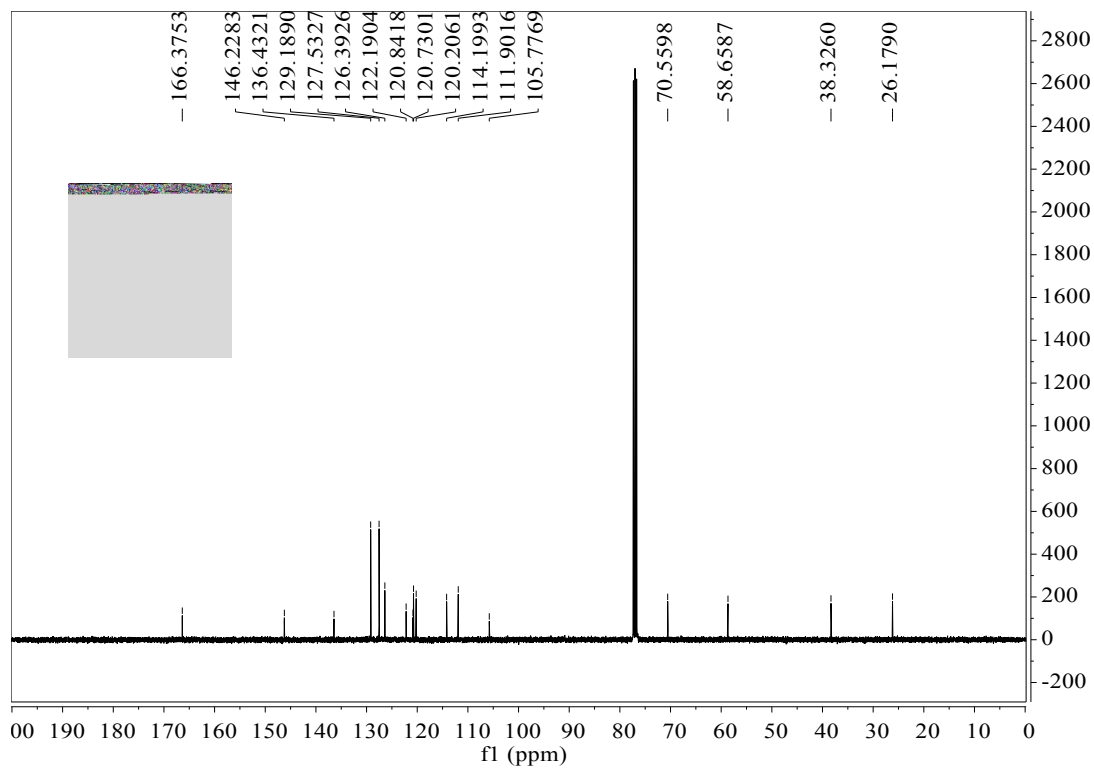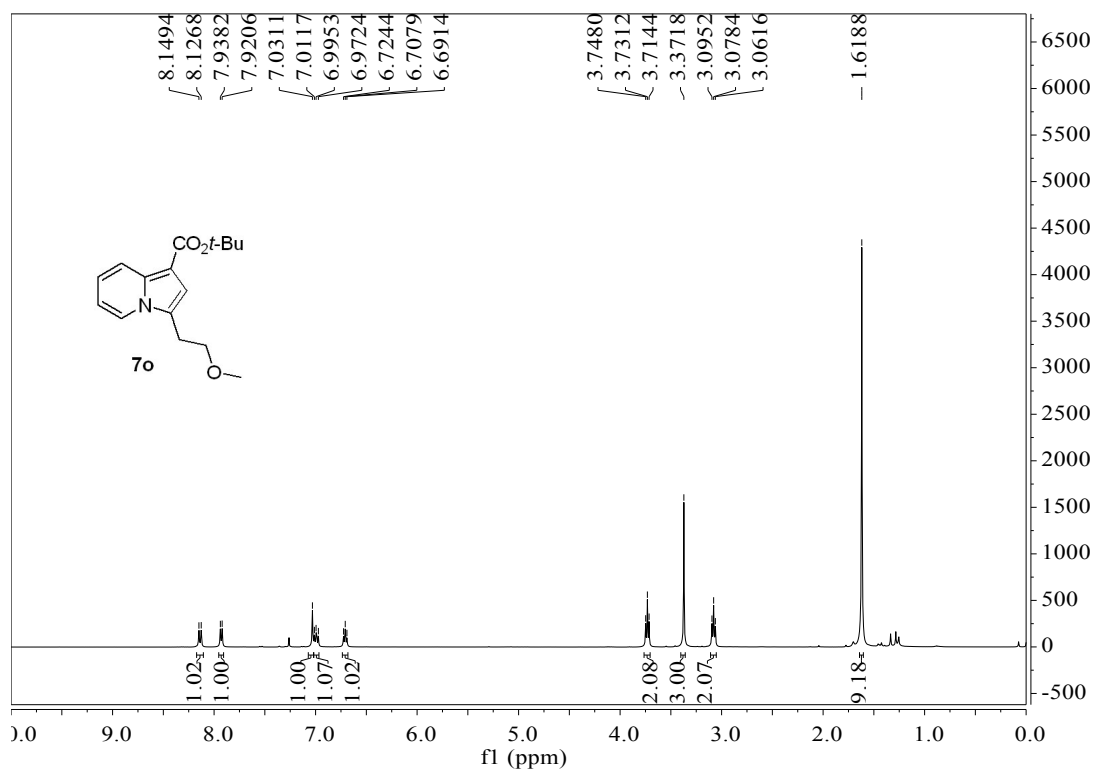



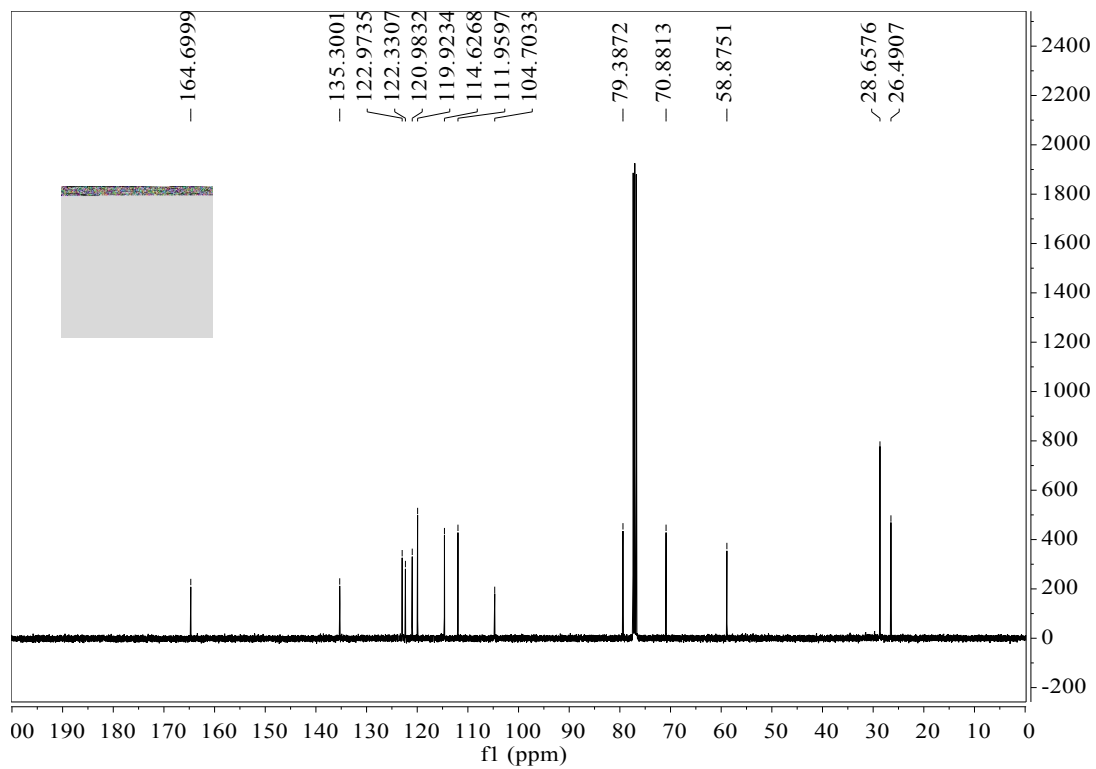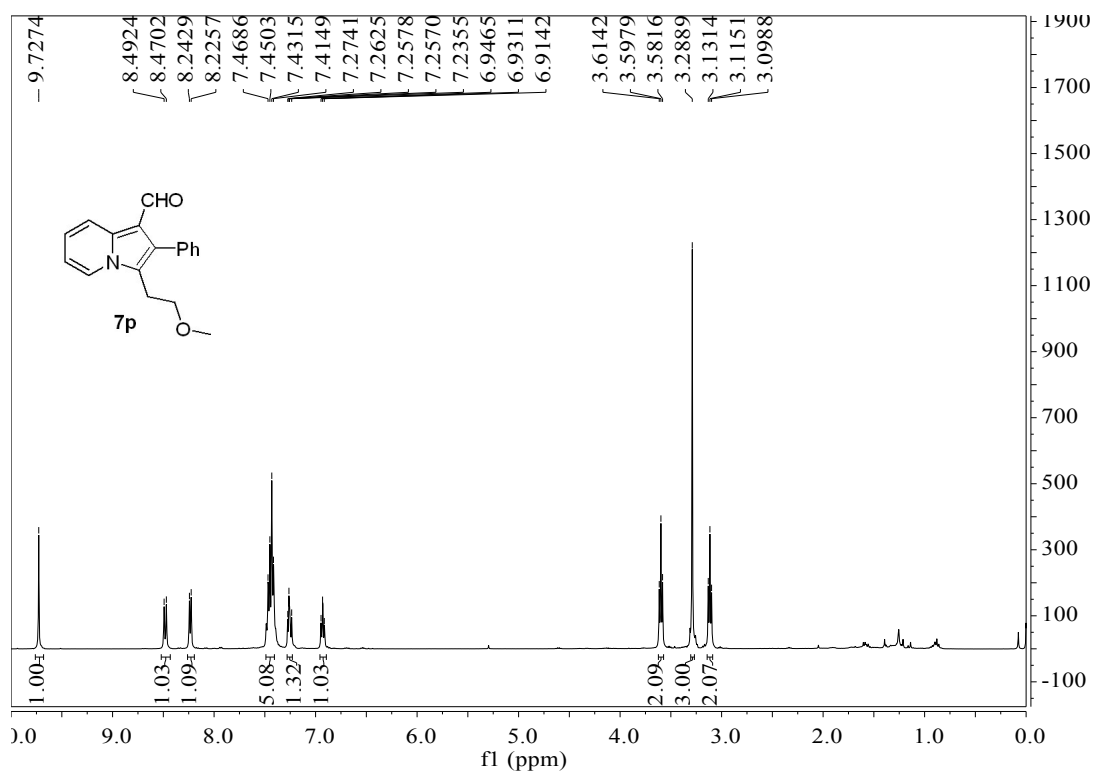

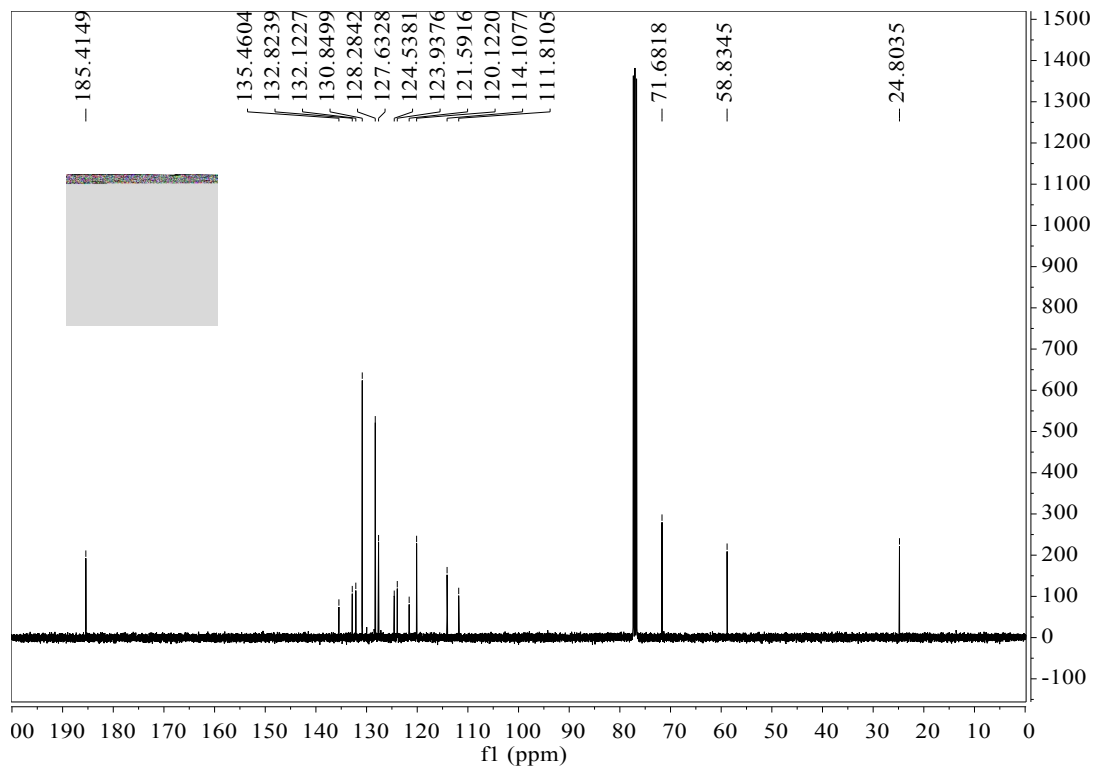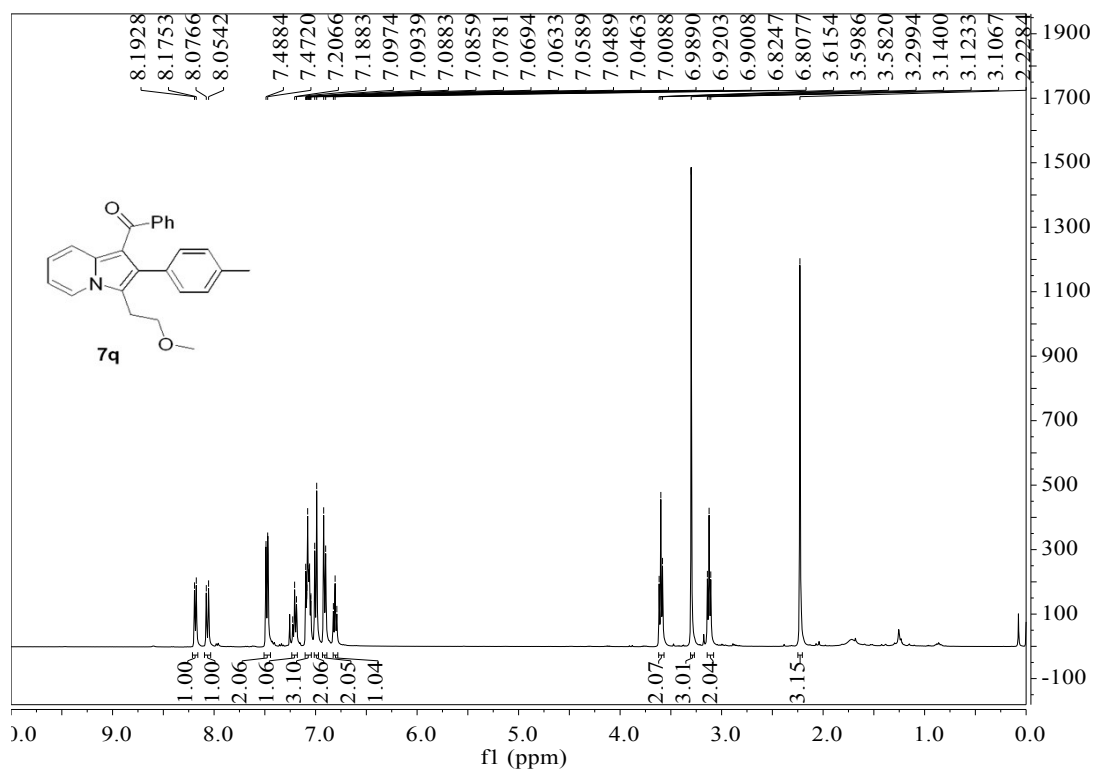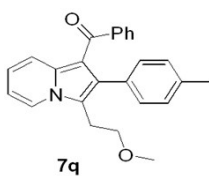

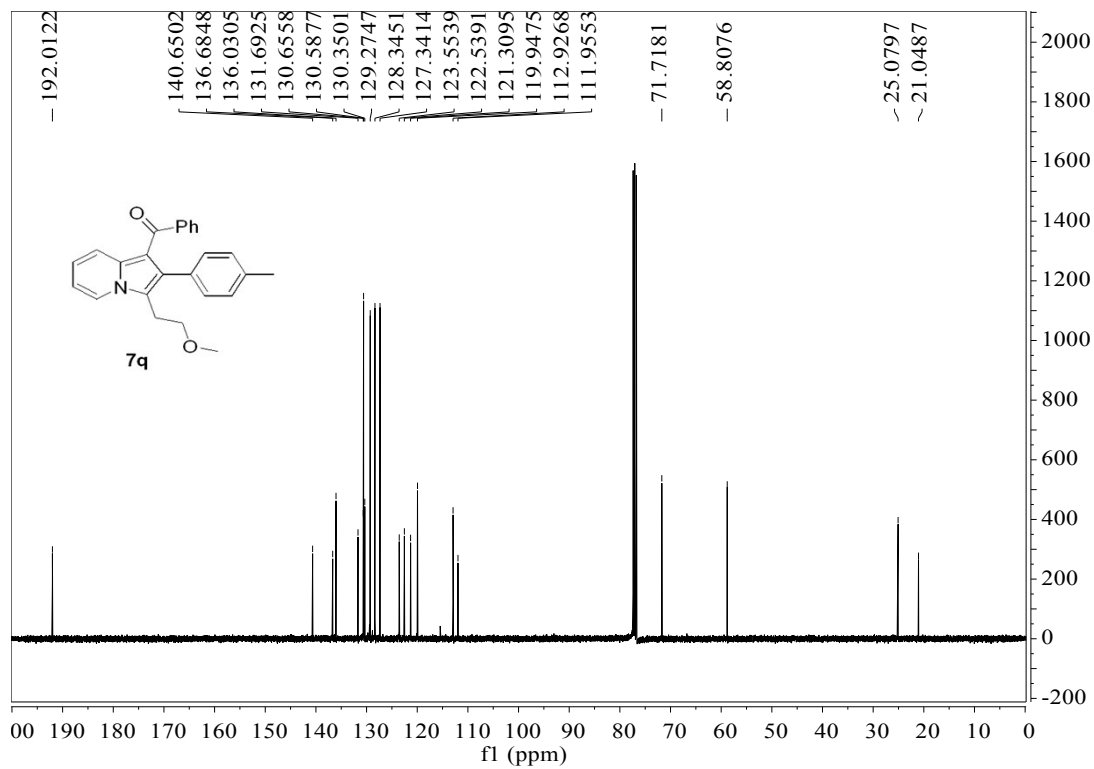

Supplement: c7ob00980a1.pdf [file c7ob00980a1.pdf]
